# ***In vivo* visualization of propagating $\alpha$ -synuclein pathologies in mouse and marmoset models by a bimodal imaging probe, C05-05**

## **Authors**

M. Ono,<sup>1</sup>†\* M. Takahashi,<sup>1</sup>† A. Shimozawa,<sup>2</sup> M. Fujinaga,<sup>1</sup> W. Mori,<sup>1</sup> Y. Nagai,<sup>1</sup> K. Mimura,<sup>1</sup> T. Minamihisamatsu,<sup>1</sup> S. Uchida,<sup>1</sup> K. Kumata,<sup>1</sup> M. Shimojo,<sup>1</sup> Y. Takado,<sup>1</sup> H. Takuwa,<sup>1</sup> H. Shimizu,<sup>3</sup> A. Kakita,<sup>3</sup> N. Sahara,<sup>1</sup> M.-R. Zhang,<sup>1</sup> T. Minaminoto,<sup>1</sup> M. Hasegawa,<sup>2</sup> M. Higuchi<sup>1</sup>

## **Affiliations**

<sup>1</sup> National Institute of Radiological Sciences, National Institutes for Quantum and Radiological Science and Technology, Chiba 263-8555, Japan.

<sup>2</sup> Department of Dementia and Higher Brain Function, Tokyo Metropolitan Institute of Medical Science, Tokyo 156-8506, Japan.

<sup>3</sup> Department of Pathology, Brain Research Institute, Niigata University, Niigata 951-8585, Japan.

† These authors contributed equally to this work

\* Correspondence: [ono.maiko@qst.go.jp](mailto:ono.maiko@qst.go.jp)

## **Abstract**

Deposition of intracellular  $\alpha$ -synuclein fibrils is implicated in neurodegenerative parkinsonian disorders, while high-contrast *in vivo* detection of  $\alpha$ -synuclein depositions has been unsuccessful in animal models and humans. Here, we have developed a bimodal imaging probe, C05-05, for visualizing  $\alpha$ -synuclein inclusions in the brains of living animals modeling  $\alpha$ -synuclein propagation. *In vivo* optical and PET imaging of a mouse model demonstrated sensitive detection of  $\alpha$ -synuclein aggregates by C05-05, revealing a dynamic propagation of fibrillogenesis along neural pathways followed by disruptions of these structures. Moreover, longitudinal <sup>18</sup>F-C05-05-PET of a marmoset model captured widespread dissemination of fibrillary pathologies accompanied by neurodegeneration detected by dopamine transporter PET. In addition, *in vitro* assays demonstrated the high-affinity binding of <sup>18</sup>F-C05-05 to  $\alpha$ -synuclein versus other protein pathologies in human brain tissues. Collectively, we propose a new imaging technology enabling etiological and therapeutic assessments of  $\alpha$ -synuclein pathogenesis at nonclinical levels, highlighting the applicability of C05-05 to clinical PET.

## **Teaser**

C05-05 enables etiological and therapeutic assessments of  $\alpha$ -synucleinopathy by visualizing  $\alpha$ -Syn deposits in living brain.

## 46 MAIN TEXT

### 47 48 Introduction

49 Parkinson's disease (PD) and dementia with Lewy bodies (DLB) are neurodegenerative  
50 diseases of high prevalence, and they are pathologically characterized by the appearance  
51 of Lewy bodies and Lewy neurites, which are mainly composed of aggregated  $\alpha$ -synuclein  
52 (1-3). Abnormal  $\alpha$ -synuclein is also a major component of glial cytoplasmic inclusions  
53 (GCIs), which are a pathological feature of multiple system atrophy (MSA), a  
54 neurodegenerative disease presenting with movement and autonomic disorders (4, 5). In  
55 these disorders, referred to as  $\alpha$ -synucleinopathies, ultrastructures of  $\alpha$ -synuclein filaments  
56 containing  $\beta$ -pleated sheets (6) may display diversity in disease-specific and individually  
57 variable manners as revealed by the latest cryo-electron microscopic analysis (7). Previous  
58 studies experimentally demonstrated that  $\alpha$ -synuclein fibrils acted as templates for the  
59 conversion of normal  $\alpha$ -synuclein molecules into misfolded species, leading to the prion-  
60 like propagation of the  $\alpha$ -synuclein fibrillogenesis throughout the brain via neural circuits  
61 (8-11).

62 Formation of intracellular  $\alpha$ -synuclein fibrils is mechanistically linked to  
63 neurodegenerative processes, and the spread of  $\alpha$ -synuclein inclusions in the brain is  
64 supposed to be the neuropathological basis of the disease progression (12-14), supporting  
65 the significance of the  $\alpha$ -synuclein assembly as a diagnostic and staging biomarker and a  
66 therapeutic target. Meanwhile, the diagnosis of PD, DLB, and MSA can only be  
67 confirmed by examining the presence of  $\alpha$ -synuclein aggregates in the autopsied brains,  
68 and has been challenging in living subjects. Furthermore, disease-modifying therapeutic  
69 approaches to the pathogenetic pathways of  $\alpha$ -synucleinopathies have been impeded by  
70 the lack of antemortem neuropathological investigations of the target protein lesions.  
71 Accordingly, imaging techniques capable of detecting  $\alpha$ -synuclein aggregates with high  
72 sensitivity in the living human brain would provide definitive information on the disease  
73 diagnosis at an early stage, and could be of great utility for the evaluation of efficacies  
74 yielded by candidate drugs targeting  $\alpha$ -synuclein pathologies at nonclinical and  
75 subsequently clinical levels.

76 Molecular imaging modalities, as exemplified by positron emission tomography (PET),  
77 have enabled visualization of amyloid  $\beta$  (15) and tau (16-22) deposits in the brain of living  
78 patients with Alzheimer's disease (AD) and allied disorders along with mouse models of  
79 these illnesses. A significant subset of the PET probes for these proteinopathies is a self-  
80 fluorescent  $\beta$ -sheet ligand and is applicable to intravital two-photon laser fluorescence  
81 microscopy of the animal models. Notably, the validity of the macroscopic PET  
82 technologies for capturing tau deposits has been proven by two-photon optical imaging of  
83 the tau transgenics at a microscopic level, demonstrating a rapid access of the probes to  
84 intraneuronal tau aggregates through the blood-brain barrier and neuronal plasma  
85 membrane in our previous works (16, 22). Hence, there has been growing expectation that  
86 small-molecule ligands for  $\beta$ -sheet structures would also serve as PET and optical probes  
87 for multi-scale assessments of intracellular  $\alpha$ -synuclein fibrils (23-24). However, *in vivo*  
88 visualization of  $\alpha$ -synuclein aggregates with high contrast have not been successful in the  
89 non-clinical and clinical settings.  $^{11}\text{C}$ -BF-227, a PET ligand developed to detect amyloid  $\beta$   
90 plaques (25), has been reported to bind to  $\alpha$ -synuclein lesions in the brains of MSA  
91 patients in a PET study (26), but *in vitro* autoradiography of postmortem MSA brain  
92 sections in a more recent study did not support significant binding of  $^{11}\text{C}$ -BF-227 to GCIs  
93 at concentrations typically achieved in PET experiments (27). The tau PET ligand,  $^{11}\text{C}$ -

94 PBB3 was also documented to react with  $\alpha$ -synuclein lesions, including Lewy bodies,  
95 Lewy neurites, and GCIs, while it has been indicated that its binding affinity for  $\alpha$ -  
96 synuclein pathologies is not sufficient for sensitive PET detection of these lesions in living  
97 individuals (28, 29). Indeed, PBB3 shows high affinity and selectivity for the  $\beta$ -sheet  
98 structure of tau filaments, which is assumed to be ultrastructurally distinct from that of  $\alpha$ -  
99 synuclein assemblies (7, 30-35). In the meantime, the modest binding of PBB3 with  $\alpha$ -  
100 synuclein inclusions implies its utility as a starting compound for the development of  
101 novel derivatives with more appropriate binding properties for *in vivo* imaging of  $\alpha$ -  
102 synucleinopathies.

103 In our screening by *in vitro* evaluation, we found that derivatives of PBB3 with (*E*)-hex-2-  
104 en-4-yne linker, termed C05 series compounds, exhibited binding to  $\alpha$ -synuclein  
105 pathologies with high reactivity and selectivity compared to PBB3 and BF-227. The *in*  
106 *vitro* characteristics of a chemical in this class, C05-01, were further analyzed with a  
107 tissue microarray in our latest work (36). In the present study, detailed non-clinical  
108 evaluations have revealed that another C05 compounds, C05-05, has more suitable  
109 properties than C05-01 for high-contrast detection of  $\alpha$ -synuclein inclusions in murine and  
110 non-human primate models of propagating  $\alpha$ -synuclein pathologies bimodally by *in vivo*  
111 optical and PET imaging from single-cell to brain-wide scales. Furthermore, the high  
112 binding affinity of C05-05 for  $\alpha$ -synuclein inclusions in brain tissues derived from PD,  
113 DLB, and MSA cases has supported the applicability of this probe to clinical PET in  
114 humans.

## 115 116 117 **Results**

### 118 **C05 series compounds bind to $\alpha$ -synuclein inclusions *in vitro***

119 The tau PET ligand, PBB3, was found to have a moderate affinity for  $\alpha$ -synuclein  
120 pathologies (28), which did not support the suitability of this compound for *in vivo*  
121 imaging of  $\alpha$ -synucleinopathies. To develop novel ligands with higher reactivity with  $\alpha$ -  
122 synuclein fibrils than PBB3 and BF-227, we screened PBB3 derivatives by fluorescence  
123 staining, in view of the fact that most of these chemicals are self-fluorescent (16, 30). We  
124 then identified C05 series compounds, which possess an (*E*)-hex-2-en-4-yne linker in the  
125 backbone structure, as candidates for  $\alpha$ -synuclein imaging agents (Fig. 1A). Double  
126 fluorescence staining of DLB brain slices with ligands and antibody against  
127 phosphorylated  $\alpha$ -synuclein (pS129) demonstrated that C05-01, C05-03, and C05-05  
128 strongly labeled Lewy bodies and Lewy neurites, whereas PBB3 and BF-227 yielded  
129 moderate and weak fluorescence signals, respectively, on these lesions (Fig. 1B). To  
130 compare the binding selectivity for  $\alpha$ -synuclein versus A $\beta$  and tau pathologies between  
131 ligands, fluorescence staining of Lewy bodies and Lewy neurites in DLB amygdala and  
132 A $\beta$  plaques and tau tangles in the AD middle frontal gyrus with the C05 series and  
133 reference compounds were quantified with a uniform imaging condition (Fig. 1C and fig.  
134 S1). The background-corrected fluorescence intensity indicated that the signals attributed  
135 to C05-01, C05-03, and C05-05 bound to  $\alpha$ -synuclein pathologies were significantly  
136 higher than those of A $\beta$  and tau (Fig. 1D), suggesting that the selectivity of C05 series  
137 compounds for  $\alpha$ -synuclein versus A $\beta$  and tau aggregates in the human brains. In contrast,  
138 the fluorescence signals originating from tau-bound PBB3 were significantly higher than  
139 those of this compound attached to  $\alpha$ -synuclein and A $\beta$  deposits, and the fluorescence

140 signals attributed to A $\beta$ -bound BF-227 were significantly higher than those of this  
141 compound attached to  $\alpha$ -synuclein and tau deposits.

### 142 **C05-05 enables *in vivo* optical visualization of $\alpha$ -synuclein inclusions in the brains of** 143 **mice modeling propagating $\alpha$ -synucleinopathy**

144 For assessing *in vivo* detectability of intracellular  $\alpha$ -synuclein deposits by C05 series  
145 compounds at an individual cell level, we utilized a mouse model of propagating  $\alpha$ -  
146 synuclein fibrillogenesis induced by inoculation of recombinant mouse  $\alpha$ -synuclein fibrils  
147 into the brain parenchyma of a wild-type mouse ( $\alpha$ -Syn mouse) (10, 11). In the  $\alpha$ -Syn  
148 mouse, aggregates of phosphorylated endogenous  $\alpha$ -synuclein molecules resembling  
149 Lewy bodies and Lewy neurites emerged bilaterally in extensive brain regions, including  
150 the striatum, cortex, amygdala and substantia nigra, from 2 weeks after unilateral  
151 inoculation of  $\alpha$ -synuclein fibrils into the striatum (fig. S2). Double-staining of brain slices  
152 with fluorescent compounds and pS129 demonstrated that C05-01, C05-03, and C05-05  
153 intensely labeled pS129-positive phosphorylated  $\alpha$ -synuclein inclusions similar to Lewy  
154 bodies and Lewy neurites in the neocortex of  $\alpha$ -Syn mice, while PBB3 and BF-227 bound  
155 modestly with these deposits (Fig. 1E). We selected C05-01 and C05-05 for the following  
156 characterizations in consideration of their suitability for  $^{18}\text{F}$  radiolabeling towards wider  
157 availability.

158 To assess the time course of *in vivo* labeling of intraneuronal  $\alpha$ -synuclein inclusions with  
159 C05-01 and C05-05 compared with PBB3, we conducted intravital two-photon laser  
160 fluorescence microscopy of the somatosensory cortex of an  $\alpha$ -Syn mouse through a cranial  
161 window. Detection of C05-05, C05-01, and PBB3 signals in the same field of view of a  
162 single individual animal indicated rapid entry of C05-05 into the brain after intraperitoneal  
163 administration, reaching  $\alpha$ -synuclein inclusions within 5 min, and the binding continued  
164 for 90 min (Fig. 2). Unlike C05-05, no noticeable increases in fluorescence signals were  
165 produced in neurons by intraperitoneally injected C05-01 and PBB3. We did not employ  
166 BF-227 as a reference compound in these assays, as its fluorescence wavelength did not fit  
167 intravital observations. *Ex vivo* examination of frozen brain sections from  $\alpha$ -Syn mouse  
168 following intravital two-photon microscopy further proves the binding of intraperitoneally  
169 administered C05-05 to  $\alpha$ -synuclein inclusions abundantly present in the somatosensory  
170 cortex of this mouse (fig. S3).

171 *Ex vivo* examination of brain tissues collected from an  $\alpha$ -Syn mouse at two hours after  
172 intraperitoneal BF-227 injection demonstrated no apparent interaction of this compound  
173 with  $\alpha$ -synuclein inclusions stained with pS129 (Fig. 3A and B). In contrast, brain samples  
174 collected from the  $\alpha$ -Syn mouse at 90 min after intraperitoneal C05-05 injection contained  
175 numerous fibrillary inclusions labeled with the injected compound in broad areas of the  
176 brain, including the striatum, neocortex and amygdala, and these aggregates were  
177 subsequently stained with pS129, proving the entry of C05-05 into the brain followed by  
178 attachment of this ligand to intraneuronal  $\alpha$ -synuclein assemblies (Fig. 3C and D). *Ex vivo*  
179 examination of brain tissues collected from a wild-type control mouse injected with saline  
180 into the striatum showed no apparent distribution of intraperitoneally administered BF-227  
181 and C05-05 in the cerebral parenchyma (fig. S4). These *in vivo* and *ex vivo* data  
182 collectively demonstrate the capability of C05-05 for high-contrast optical visualization of  
183  $\alpha$ -synuclein inclusions in a living  $\alpha$ -synucleinopathy mouse model.



## ***In vivo* microscopy with C05-05 allows tracking of pathological $\alpha$ -synuclein propagation through neural processes in the brain of a mouse model**

To assess the dissemination of fibrillary  $\alpha$ -synuclein pathologies via neuronal processes and cell bodies and consequent disruptions of these cellular structures on a longitudinal basis, we performed biweekly intravital two-photon imaging of  $\alpha$ -synuclein inclusions in the brain of an  $\alpha$ -Syn mouse inoculated with  $\alpha$ -synuclein fibrils into the unilateral striatum. Prior to *in vivo* assessments, histopathological examinations of brain sections collected from  $\alpha$ -Syn mice at several time points after the inoculation suggested the appearance of endogenous  $\alpha$ -synuclein aggregates in neurites at two weeks, transient increase of inclusions in neurites and soma at four weeks, and subsequent decline of neuritic inclusions and maturation of somatic aggregates in the somatosensory cortex ipsilateral to the inoculation (Fig. 4A).

Correspondingly, *in vivo* longitudinal microscopic imaging in  $\alpha$ -Syn mice by two-photon laser scanning with C05-05 demonstrated the spatiotemporal changes of  $\alpha$ -synuclein inclusions within an individual. Neuritic  $\alpha$ -synuclein accumulations labeled with C05-05 appeared abundantly in the somatosensory cortex of the inoculated hemisphere at four weeks and then decreased at six weeks (Fig. 4B, white arrowheads). Moreover, the formation and growth of somatic  $\alpha$ -synuclein inclusions labeled with C05-05 were observed at 8 and 12 weeks after inoculation (Fig. 4B, yellow arrowheads). High-magnification images clearly visualized the intraneuronal expansion of pathological  $\alpha$ -synuclein aggregates from neuritic to somatic compartments in a week (Fig. 4C). Moreover, time-course assays provided more compelling evidence for the disappearance of neuritic (Fig. 4D, top) and somatic (Fig. 4D, bottom)  $\alpha$ -synuclein inclusions in two weeks and demonstrated loss of mCherry-expressing neurons bearing C05-05-positive  $\alpha$ -synuclein fibrils (Fig. 4E). These *in vivo* data along the course after the inoculation of  $\alpha$ -synuclein fibrils clarified stretching of  $\alpha$ -synuclein depositions inside a single neuron, serially inducing neuritic and somatic fibril formations and subsequent breakdowns of neuronal structures, which is suggestive of  $\alpha$ -synuclein-provoked neurotoxic insults. Our findings also demonstrated the utility of C05-05 as an optical probe for a dynamic pursuit of the neurodegenerative  $\alpha$ -synuclein pathogenesis at a single-cell level.

## **PET imaging with $^{18}\text{F}$ -C05-05 visualizes depositions and propagations of pathological $\alpha$ -synuclein species in the brains of living model animals**

To assess the *in vivo* performance of  $^{18}\text{F}$ -labeled C05-05 ( $^{18}\text{F}$ -C05-05, fig. S5) as a PET ligand, we performed PET scans with  $^{18}\text{F}$ -C05-05 for  $\alpha$ -Syn mice at six months after injection of  $\alpha$ -synuclein fibrils or saline into the bilateral striata, followed by *ex vivo* autoradiography and histopathological examinations. As depicted in Fig. 5A, the retention of radioligand was overtly increased in the bilateral striatal and cortical areas of an  $\alpha$ -Syn mouse, in sharp contrast to the low radioactivity signals sustained in these brain regions of a control mouse.  $^{18}\text{F}$ -C05-05 rapidly entered the brain after intravenous administration, and peak radioactivity uptakes estimated as standardized uptake values (SUVs) were 1.19 and 1.11 in the striatum and cortex, respectively (Fig. 5B, top and fig. S6). This was followed by a prompt washout of radioactivity from the brain of control mice, whereas the clearance was retarded in the striatum and cortex of  $\alpha$ -Syn mice, reflecting radioligand binding to  $\alpha$ -synuclein deposits. In the cerebellum lacking  $\alpha$ -synuclein pathologies, there was no clear difference in the retention of radioligand between  $\alpha$ -Syn and control mice (Fig. 5A, bottom and 5B, top), justifying the use of the cerebellum as a reference tissue for

230 quantification of the radioligand binding. The target-to-reference ratios of the  
231 radioactivity, which is denoted as standardized uptake value ratio (SUVR), at each time  
232 point and average SUVR at 90-120 min after intravenous administration of  $^{18}\text{F}$ -C05-05  
233 were increased in the striatum and cortex of  $\alpha$ -Syn mice compared to those of control mice  
234 (Fig. 5B, bottom).

235 *Ex vivo* autoradiography of brain tissues collected from  $\alpha$ -Syn and control mice used for  
236 PET scan at 90 min after intravenous  $^{18}\text{F}$ -C05-05 injection demonstrated accumulation of  
237 the radioligand in the striatum, cortex and amygdala of the  $\alpha$ -Syn mouse harboring  
238 abundant neuronal  $\alpha$ -synuclein inclusions (Fig. 5C and D). Conversely, there was no  
239 noticeable increase of radioligand retentions in these brain regions of the control mouse.  
240 In addition, the radioligand accumulation was minimal in the cerebellum of the  $\alpha$ -Syn and  
241 control mice, the area devoid of  $\alpha$ -synuclein deposits, while non-specific radioligand  
242 accumulations in several white matter regions, including the corpus callosum and fimbria  
243 of the hippocampus, was observed in both of these mice.

244 Since the small brain volumes of mice impeded clear separations between striatal and  
245 neocortical radioactivity signals as assessed by PET, the *in vivo* traceability of the inter-  
246 regional  $\alpha$ -synuclein dissemination with the use of  $^{18}\text{F}$ -C05-05 remained rather  
247 inconclusive. We accordingly employed a non-human primate model of propagating  $\alpha$ -  
248 synuclein pathologies by inoculating recombinant marmoset  $\alpha$ -synuclein fibrils into the  
249 brain parenchyma ( $\alpha$ -Syn marmoset). Our previous work documented that marmosets  
250 inoculated with murine  $\alpha$ -synuclein fibrils displayed conversion of endogenous  $\alpha$ -  
251 synuclein molecules into fibrillary aggregates, resulting in abundant accumulations of  
252 phosphorylated  $\alpha$ -synuclein inclusions resembling Lewy bodies and Lewy neurites in the  
253 inoculation sites and subsequently remote brain areas through the neural network (37). It  
254 was noteworthy that the retrograde propagation of pathological  $\alpha$ -synuclein species from  
255 the caudate nucleus and putamen to substantia nigra through the nigrostriatal  
256 dopaminergic pathway was prominent at 3 months after inoculation (37). Similar to this  
257 model, an  $\alpha$ -Syn marmoset receiving marmoset  $\alpha$ -synuclein fibrils exhibited enhanced  
258 retention of  $^{18}\text{F}$ -C05-05 in a sub-portion of the caudate nucleus containing the injection  
259 site at 1 month after inoculation, which spread extensively in the caudate nucleus,  
260 putamen, and substantia nigra of the ipsilateral hemisphere and to a lesser extent in the  
261 contralateral left hemisphere at three months (Fig. 6A). We also performed PET imaging  
262 of dopamine transporters with a specific radioligand,  $^{11}\text{C}$ -PE2I, which has proven useful  
263 for detecting degenerations of dopaminergic neurons in PD and its models (38-40), in the  
264  $\alpha$ -Syn marmoset before (Pre) and 3 months after inoculation. Parametric images of  $^{11}\text{C}$ -  
265 PE2I binding potential ( $\text{BP}_{\text{ND}}$ ) demonstrated a decrease of dopamine transporters in the  
266 caudate nucleus, putamen, and substantia nigra of the inoculated hemisphere compared to  
267 the contralateral hemisphere, in agreement with the distribution of augmented  $^{18}\text{F}$ -C05-05  
268 retentions and pathological  $\alpha$ -synuclein depositions (Fig. 6B).

269 The brain of this animal was sampled at four months after inoculation, and  
270 immunohistochemical analyses of the brain slices demonstrated the distribution of pS129-  
271 stained  $\alpha$ -synuclein inclusions in agreement with *in vivo* PET findings with  $^{18}\text{F}$ -C05-05 at  
272 three months (Fig. 6C). Double-staining with non-radiolabeled C05-05 and pS129  
273 confirmed dense accumulations of  $\alpha$ -synuclein aggregates in neuronal processes and  
274 somas recapitulating PD and DLB pathologies in the caudate nucleus, putamen, and  
275 substantia nigra of the inoculated hemisphere (Fig. 6D). The corresponding brain areas of  
276 the contralateral hemisphere contained less abundant  $\alpha$ -synuclein inclusions in neurites

277 and neuronal somas. These  $\alpha$ -synuclein pathologies were fluorescently labeled with non-  
278 radiolabeled C05-05, suggesting that the increased retention of radioligand in  $^{18}\text{F}$ -C05-05-  
279 PET stemmed from its *in vivo* interaction with  $\alpha$ -synuclein inclusions (Fig. 6A and D).  
280 Meanwhile, non-specific accumulations of radioligand in bilateral white matter regions  
281 flanking the putamen was noted in the pre-inoculation  $^{18}\text{F}$ -C05-05-PET (Fig. 6A, top), and  
282 the absence of  $\alpha$ -synuclein deposits in these areas was ensured by histochemical and  
283 immunohistochemical assays.

284 These *in vivo* data provide the first PET demonstration of time-course imaging of  
285 pathological  $\alpha$ -synuclein deposits in living animal models along the course of spatially  
286 expanding fibrillogenesis accompanied by the degeneration of neural circuits involved as  
287 dissemination pathways.

### 288 **$^{18}\text{F}$ -C05-05 displays high-affinity binding to $\alpha$ -synuclein pathologies in DLB, PD and** 289 **MSA brain tissues**

290 To assess binding of  $^{18}\text{F}$ -C05-05 to human  $\alpha$ -synuclein pathologies at a low concentration  
291 (10 nM), we performed *in vitro* autoradiography of basal ganglia from MSA and  
292 Parkinson's disease with dementia (PDD) cases and amygdala from DLB case (Fig. 7A).  
293 The total binding of  $^{18}\text{F}$ -C05-05 was markedly abolished by excessive non-radiolabeled  
294 C05-05, indicating the saturability of the radioligand binding. The MSA cases showed  
295 specific binding of  $^{18}\text{F}$ -C05-05 in association with the local  $\alpha$ -synuclein burden (Fig. 7A  
296 and B). A case with mild pathology (MSA-1) had no binding of  $^{18}\text{F}$ -C05-05 to the  
297 striatopallidal fibers. MSA-2, which was burdened with moderate  $\alpha$ -synuclein deposits,  
298 showed weak  $^{18}\text{F}$ -C05-05 radioactivity signals in striatopallidal fibers containing  
299 numerous GCIs. MSA-3, which is a case with severe  $\alpha$ -synuclein pathologies, exhibited  
300 intense radioligand binding to the striatopallidal fibers harboring densely packed GCIs.  
301 The DLB and PDD cases also showed specific binding of  $^{18}\text{F}$ -C05-05 in line with the  
302 distribution of  $\alpha$ -synuclein pathology in the amygdala and substantia nigra, respectively.

303 We then conducted triple staining of the sections used for autoradiography with non-  
304 radiolabeled C05-05 and antibodies against  $\alpha$ -synuclein (LB509) and antibody against  
305 phosphorylated tau (pS199/202). The fluorescence labeling with non-radiolabeled C05-05  
306 and LB509 was noted on GCIs in the MSA striatopallidal fibers, and Lewy bodies and  
307 Lewy neurites in the DLB amygdala and PDD substantia nigra, and these areas were  
308 devoid of pS199/202-immunoreactive phosphorylated tau pathologies (Fig. 7B).

309 We also quantified the affinity of  $^{18}\text{F}$ -C05-05 for  $\alpha$ -synuclein aggregates in homogenized  
310 DLB amygdala tissues in comparison to AD frontal cortical tissues. Radioligand binding  
311 in these tissues was homologously blocked by non-radiolabeled C05-05 in a  
312 concentration-dependent fashion (Fig. 7C), indicating binding saturability.  $^{18}\text{F}$ -C05-05  
313 displayed high-affinity binding in DLB homogenates with the concentration inducing 50%  
314 homologous inhibition (IC<sub>50</sub>) of 1.5 nM (Fig. 7F). This radioligand was not highly  
315 binding with A $\beta$  and tau aggregates in AD tissues relative to DLB  $\alpha$ -synuclein deposits,  
316 with IC<sub>50</sub> of 12.9 nM. Unlike  $^{18}\text{F}$ -C05-05, tau PET tracers,  $^{11}\text{C}$ -PBB3 and  $^{18}\text{F}$ -PM-PBB3,  
317 displayed relatively low affinities for  $\alpha$ -synuclein deposits in DLB homogenates with  
318 IC<sub>50</sub> values of 58.8 nM and 26.5 nM, respectively, while these radioligands more tightly  
319 bound to AD-type protein fibrils than  $\alpha$ -synuclein aggregates, with IC<sub>50</sub> values of 8.6 nM  
320 and 8.0 nM, respectively (Fig. 7F). These results of *in vitro* autoradiographic and  
321 radioligand binding assays highlight the reactivity of  $^{18}\text{F}$ -C05-05 with human  $\alpha$ -synuclein

322 pathologies with much higher affinity than existing PET tracer for non- $\alpha$ -synuclein  
323 aggregates, supporting the potentials of this novel radioligand for visualizing hallmark  
324 lesions in living patients with  $\alpha$ -synucleinopathies.

## 325 Discussion

326 The current work has offered a powerful imaging tool to pursue the molecular and cellular  
327 mechanisms of the neurodegenerative  $\alpha$ -synucleinopathies in the basic research on animal  
328 models, and this technology is translatable to clinical PET assessments of PD and  
329 associated disorders. Indeed, the first-in-human study of  $^{18}\text{F}$ -C05-05 is being prepared by  
330 undertaking safety tests of this compound. The imaging methodology with  $^{18}\text{F}$ -C05-05  
331 potentially meets the needs for the early diagnosis and differentiation of neurocognitive  
332 and movement disorders by targeting neurotoxic fibrillary species of  $\alpha$ -synuclein  
333 molecules, along with the discovery and development of anti- $\alpha$ -synuclein therapeutics as  
334 disease-modifying treatments (41-44). Our bimodal *in vivo* optical and PET assays have  
335 allowed longitudinal tracking of  $\alpha$ -synuclein propagations through neural pathways from  
336 subcellular to brain-wide scales, facilitating the non-clinical evaluation of efficacies  
337 exerted by a candidate drug counteracting the etiological processes of  $\alpha$ -  
338 synucleinopathies.  
339

340 It is noteworthy that the substitution of the (2*E*, 4*E*)-hexa-2, 4-dien linker in the chemical  
341 structure of a tau imaging agent, PBB3, with (*E*)-hex-2-en-4-yne resulted in a profound  
342 increase of the ligand binding to  $\alpha$ -synuclein versus tau and A $\beta$  fibrils, leading to the  
343 generation of C05 series compounds. A recent molecular docking analysis based on the  
344 cryo-EM structure of AD-type tau filaments suggested that PBB3 binds to these fibrillary  
345 assemblies in a direction perpendicular to the fibril axis (32). A more recent cryo-EM  
346 assay revealed that the protofilament axis tilts with respect to the fibril axis in  $\alpha$ -synuclein  
347 assemblies extracted from MSA brains (7). The linker substitution could produce  
348 differences in the backbone twist angle between PBB3 and C05 series compounds at a  
349 minimum energy state, which may affect the fitness of the chemical for the binding  
350 surface on the filament with a unique distortion angle. In fact, IC<sub>50</sub> of C05-05 for the  
351 homologous binding blockade was approximately 40- and 18-fold smaller than those of  
352 PBB3 and PM-PBB3, respectively, implying the critical role of the linker angle in the  
353 ligand affinity for pathological fibrils. It is yet to be clarified whether C05 series  
354 compounds exhibit differential reactivity with PD, DLB, and MSA  $\alpha$ -synuclein fibrils,  
355 although autoradiographic labeling of pathological inclusions in those illnesses was  
356 demonstrated with  $^{18}\text{F}$ -C05-05 in the present assay. It has been reported that the  
357 ultrastructure of tau fibrils shows diversity among AD, Pick's disease, and corticobasal  
358 degeneration (31, 33, 45), and this variation could underly distinct binding of tau PET  
359 probes to AD versus non-AD tau pathologies (22, 30). On the analogy of these insights, it  
360 will be required to assess the *in vitro* interaction of C05-05 and related chemicals with  
361 aggregates in various  $\alpha$ -synucleinopathies, which will provide useful information for  
362 predicting the *in vivo* performance of the probes in clinical PET imaging of cases with  
363 these disorders.

364 Intravital two-photon laser microscopy with C05-05 has enabled longitudinal imaging of  
365 the  $\alpha$ -synuclein fibrillogenesis at a subcellular scale in the brain of a living  $\alpha$ -  
366 synucleinopathy mouse model for the first time, visualizing the dynamic processes in the  
367 formation of  $\alpha$ -synuclein lesions, including a spatiotemporal connection between the  
368 developments of Lewy neurite-like neuritic aggregates and Lewy body-like somatic



369 inclusion in a single neuron, as well as the disappearance of these fibrillar deposits. While  
370 we found evidence that the vanishment of  $\alpha$ -synuclein fibrils reflects the loss of neurons  
371 loaded with inclusions, the dynamic appearance and disappearance of the aggregates may  
372 also unfold as a consequence of continuous translocations of  $\alpha$ -synuclein assemblies  
373 through neuritic processes. The mechanisms linking the accumulations of  $\alpha$ -synuclein  
374 fibrils and loss of neurons or their substructures remain elusive, and cell-autonomous (46,  
375 47) and non-cell-autonomous (48, 49) death of neurons could be provoked in the  
376 pathogenetic pathway. Such etiological cellular events will be microscopically examined  
377 by monitoring interactions between glial cells expressing fluorescent proteins and neurons  
378 bearing C05-05-positive  $\alpha$ -synuclein deposits. Meanwhile, the transient accumulation of  
379  $\alpha$ -synuclein aggregates in neuronal compartments may indicate the transport of these  
380 pathological components along neurites, but it is also presumable that a significant portion  
381 of the fibrils could be degraded by autophagic and other related processes. In addition, the  
382 stretching of  $\alpha$ -synuclein depositions inside neurites towards the cell body might be  
383 caused by a domino-like conversion of endogenous  $\alpha$ -synuclein molecules to misfolded  
384 forms prone to the self-aggregation, whereas dislocation of native  $\alpha$ -synuclein proteins  
385 from presynaptic to neuritic and somatic compartments should be necessary for this  
386 involvement. The localization of endogenous  $\alpha$ -synuclein molecules and their engagement  
387 in the fibril formation would be investigated in detail by expressing fused  $\alpha$ -synuclein and  
388 fluorescent proteins (50) in neurons of  $\alpha$ -Syn mice, which could be used for intravital  
389 microscopic assays with C05-05.

390 Since our longitudinal PET scans with  $^{18}\text{F}$ -C05-05 have successfully captured the  
391 dissemination of  $\alpha$ -synuclein pathologies in an  $\alpha$ -Syn marmoset along the course  
392 following the fibril inoculation, this imaging technology will pave the way to the  
393 neuroimaging-based evaluations of the disease severity and progression in  $\alpha$ -  
394 synucleinopathy patients. The topology of  $\alpha$ -synuclein pathology and its chronological  
395 change are known to be closely correlated with the symptomatic phenotypes (12-14),  
396 indicating the local neurotoxicity of aggregated  $\alpha$ -synuclein molecules. In the marmoset  
397 model of  $\alpha$ -synuclein propagation, intensification and expansion of  $\alpha$ -synuclein  
398 depositions visualized by  $^{18}\text{F}$ -C05-05 were in association with declines of the nigral  
399 dopaminergic neurons and their striatal terminals as assessed by PET imaging of  
400 dopamine transporters, in resemblance to the dopaminergic deficits in PD. This  
401 observation also implies that  $^{18}\text{F}$ -C05-05 could illuminate  $\alpha$ -synuclein species critically  
402 involved in functional and structural disruptions of neurons. Previous studies suggested  
403 linkage of misfolded  $\alpha$ -synuclein proteins with synaptic dysfunctions, such as a decrease  
404 of soluble N-ethylmaleimide-sensitive factor attachment protein receptor (SNARE)  
405 complex assembly and synaptic vesicle motility (51-54). Influences of C05-05-detectable  
406  $\alpha$ -synuclein accumulations on the functionality of individual neurons will be examined by  
407 conducting intravital two-photon microscopy of  $\alpha$ -Syn mice expressing calcium sensor  
408 proteins, and this assay system would be utilized for obtaining pathological and functional  
409 outcome measures in the non-clinical evaluation of a candidate therapeutic agent.

410 The total amount of abnormal  $\alpha$ -synuclein proteins was reported to be approximately 50 -  
411 200 nM in the brainstem and subcortical regions of advanced DLB and MSA cases, which  
412 was more than 10-fold smaller than the amount of A $\beta$  peptide deposited in the brain of AD  
413 patients (55). This finding raises a concern on the visibility of  $\alpha$ -synuclein pathologies by  
414 PET in a clinical setting. The sensitive detection of  $\alpha$ -synuclein pathologies in the brain of  
415 murine and non-human primate models was permitted by appropriate pharmacokinetic and  
416 pharmacodynamic characteristics of this probe in living animals. The high reactivity of



417 C05 series compounds with  $\alpha$ -synuclein inclusions relative to A $\beta$  and tau deposits was  
418 demonstrated by *in vitro* fluorescence staining and binding assays, and IC<sub>50</sub> of <sup>18</sup>F-C05-  
419 05 for the homologous blockade of its binding to  $\alpha$ -synuclein aggregates in DLB tissue  
420 was 5 – 6 times lower than those of <sup>11</sup>C-PBB3 and <sup>18</sup>F-PM-PBB3 for the self-blockade of  
421 their binding to tau fibrils in AD tissue. Accordingly, PET with <sup>18</sup>F-C05-05 would  
422 visualize  $\alpha$ -synuclein depositions in DLB cases even if the brains of these patients possess  
423 radioligand binding sites with 5-fold lower density than AD brains. In contrast, IC<sub>50</sub>  
424 values of <sup>11</sup>C-PBB3 and <sup>18</sup>F-PM-PBB3 for the self-blockade of their binding in DLB brain  
425 homogenates were much higher than that of <sup>18</sup>F-C05-05, leading to the notion that these  
426 tau ligands are unlikely to detect  $\alpha$ -synuclein fibrils in living individuals with sufficient  
427 sensitivity. Furthermore, our histological data illustrated that  $\alpha$ -synuclein pathologies in  
428 the midbrain of an  $\alpha$ -Syn marmoset were less abundant than pathological deposits in the  
429 DLB amygdala, but these non-human primate deposits were detectable by <sup>18</sup>F-C05-05-  
430 PET. These facts could bring an implication on the usability of <sup>18</sup>F-C05-05 for high-  
431 sensitivity imaging of core pathologies in  $\alpha$ -synucleinopathy cases.

432 In addition to the reactivity with the target lesion, the entry of the compound into the brain  
433 is a key factor for yielding a high signal-to-noise ratio in PET neuroimaging. Among C05  
434 series compounds, C05-01 and C05-05 were fluorinated chemicals with desirable *in vitro*  
435 binding properties (Fig. 1D) (36). However, visualization of  $\alpha$ -synuclein aggregates by  
436 intravital two-photon microscopic imaging of model mice was unsuccessful with C05-01.  
437 It is conceivable that the hydroxy moiety of C05-01 could be promptly conjugated with  
438 sulfate after systemic administration in a mode similar to PBB3 (56), and such metabolic  
439 modification was circumvented by the replacement of this structural group with a  
440 fluoroisopropanol moiety in PM-PBB3 (22) and C05-05 (fig. S6), increasing the amount  
441 of the intact compound entering the brain. In fact, the peak radioactivity uptake of <sup>18</sup>F-  
442 C05-05 in the frontal cortex (SUV, 1.11; Fig. 5B) was approximately 2-fold higher than  
443 that of <sup>18</sup>F-C05-01 (SUV, 0.58; fig. S7) in PET imaging of wild-type control mice. In  
444 addition, <sup>18</sup>F-C05-05 has been confirmed to be decomposed to a hydrophilic  
445 radiometabolite in plasma, suggesting lower entry of the radiometabolite than  
446 unmetabolized compound into the brain (fig. S6).

447 Despite promising features of <sup>18</sup>F-C05-05-PET as a neuroimaging technique translatable  
448 from animal models to humans, several technical issues are yet to be addressed. In  $\alpha$ -Syn  
449 mice, PET with <sup>18</sup>F-C05-05 visualized abundant  $\alpha$ -synuclein accumulation in the striatum  
450 and cortex, but failed to detect abundant  $\alpha$ -synuclein accumulation in amygdala (fig. S8).  
451 *Ex vivo* examination of brain tissues collected from the model mice confirmed the binding  
452 of <sup>18</sup>F-C05-05 systemically administered to  $\alpha$ -synuclein inclusions deposited in this area.  
453 Therefore, the incapability of <sup>18</sup>F-C05-05-PET for capturing target pathologies in the  
454 amygdala is attributable to the limited spatial resolution of the imaging device and  
455 consequent partial volume effects, which might preclude *in vivo* neuropathological  
456 assessments in a relatively small anatomical structure. A possible solution to this issue  
457 could be the use of a non-human primate model with a larger brain volume, but it should  
458 be taken into account that non-specific accumulation of radioligand in white matter  
459 regions was observed by <sup>18</sup>F-C05-05-PET imaging of a marmoset model even before  
460 inoculation of  $\alpha$ -synuclein fibrils. Notwithstanding these pathology-unrelated signals, <sup>18</sup>F-  
461 C05-05-PET could detect increased radioligand retention associated with  $\alpha$ -synuclein  
462 inclusions in white matter structures. In the clinical application of <sup>18</sup>F-C05-05 to humans,  
463 non-specific radioactivity signals in the white matter might impede high-contrast imaging  
464 of  $\alpha$ -synuclein lesions, particularly in the MSA brains, since GCIs accumulates in white

465 matter areas such as deep cerebellar structures (57, 58). Moreover, several tau PET ligands  
466 are known to show off-target binding to monoamine oxidases A and B (59-62). By  
467 contrast, previous studies documented that <sup>11</sup>C-PBB3 and its analogs, including <sup>18</sup>F-PM-  
468 PBB3 and <sup>18</sup>F-C05-01, did not cross-react with these enzymes (22, 36, 63), and our *in*  
469 *vitro* binding assay suggested insensitivity of <sup>18</sup>F-C05-05 to monoamine oxidases (fig. S9).

470 In the present study, we granted the highest priority to the sensitive PET detection of  $\alpha$ -  
471 synuclein pathologies with a high-affinity radioligand, as such a goal has been reached in  
472 neither animal models nor humans. In the brains of  $\alpha$ -synucleinopathy patients,  $\alpha$ -  
473 synuclein lesions are often co-localized with A $\beta$  and tau aggregates. Tau pathologies at  
474 Braak stage III or above and A $\beta$  pathologies are observed in more than 50% and 80% of  
475  $\alpha$ -synucleinopathy patients, respectively (64). This fact raises the necessity for the  
476 development of a specific ligand for  $\alpha$ -synuclein deposits with minimal cross-reactivity  
477 with other pathological fibrils. <sup>18</sup>F-C05-05 displayed more than eight times smaller IC50  
478 (1.5 nM) in DLB homogenates than in AD homogenates (12.9 nM), but its reactivity with  
479 tau deposits might not be markedly lower than that of <sup>11</sup>C-PBB3 and <sup>18</sup>F-PM-PBB3. In  
480 view of the putative structure-activity relationships indicated in this study, however, we  
481 are able to take advantage of  $\beta$ -sheet ligands with the (*E*)-hex-2-en-4-yne linker as potent  
482 binders, and structural modifications will be made for enhancing the selectivity of the  
483 chemicals by replacing aromatic rings and sidechains. It is also of significance that optical  
484 and PET imaging modalities can be utilized for the characterization of new candidate  
485 imaging agents.

486 To conclude, the current neuroimaging platform incorporating C05-05 is implementable  
487 for multi-scale analysis of the neurodegenerative  $\alpha$ -synuclein fibrillogenesis and  
488 pharmacological actions of a drug candidate on this etiological process in animal models.  
489 Our assays have also provided essential information on the feasibility of <sup>18</sup>F-C05-05 for  
490 the first demonstration of  $\alpha$ -synuclein PET imaging in humans with adequate contrast.

## 491 **Materials and Methods**

### 492 **Experimental animals**

494 All animals studied here were maintained and handled in accordance with the National  
495 Research Council's Guide for the Care and Use of Laboratory Animals. Protocols for the  
496 present animal experiments were approved by the Animal Ethics Committees of the  
497 National Institutes for Quantum and Radiological Science and Technology (approval  
498 number: 07-1049-31, 11-1038-11). A total of 35 adult C57BL/6J mice (male, mean age  
499 5.4 months, Japan SLC Inc) were used for the histochemical analysis, *ex vivo* examination,  
500 two-photon microscopy and PET scanning, and one adult marmoset (male, 2 years old,  
501 300-365 g body weights) was used for PET scanning and histochemical analysis in this  
502 study. All mice and the marmoset were maintained in a 12 hours' light/dark cycle with ad  
503 libitum access to standard diet and water.

### 504 **Compounds and antibodies**

505 C05-01 ((*E*)-2-(4-(2-fluoro-6-(methylamino)pyridine-3-yl)but-1-en-3-yn-1-  
506 yl)benzo[*d*]thiazol-6-ol), C05-03 ((*E*)-2-(4-(6-(methylamino)pyridin-3-yl)but-1-en-3-yn-1-  
507 yl)benzo[*d*]thiazol-6-ol), C05-05 ((*E*)-1-fluoro-3-((2-(4-(6-(methylamino)pyridine-3-  
508 yl)but-1-en-3-yn-1-yl)benzo[*d*]thiazol-6-yl)oxy)propan-2-ol), PBB3 (2-((1*E*,3*E*)-4-(6-

509 (methylamino)pyridine-3-yl)buta-1,3-dienyl)benzo[*d*]thiazol-6-ol), desmethyl precursor of  
510 <sup>11</sup>C-PBB3, PM-PBB3 1-fluoro-3-((2-((1*E*,3*E*)-4-(6-(methylamino)pyridine-3-yl)buta-1,3-  
511 dien-1-yl)benzo[*d*]thiazol-6-yl)oxy)propan-2-ol, tosylate precursor of <sup>18</sup>F-PM-PBB3, and  
512 desmethyl precursor of <sup>11</sup>C-PE2I were custom-synthesized (Nard Institute and KNC  
513 Laboratories). BF-227 (Nard Institute, NP039-0), clorgiline (Sigma-Aldrich, M3778),  
514 selegiline (Sigma-Aldrich, NMID822), and sulforhodamine 101 (Sigma-Aldrich, S7635)  
515 are commercially available. Monoclonal antibodies against  $\alpha$ -synuclein phosphorylated at  
516 Ser 129 (pS129; abcam, ab59264),  $\alpha$ -synuclein (LB509; abcam, ab27766), tau  
517 phosphorylated at Ser 202 and Thr 205 (AT8; ThermoFisher Scientific, MN1020), and  
518 amyloid  $\beta$  (6E10; BioLegend, 803004), and polyclonal antibody against tau  
519 phosphorylated at Ser 199 and Thr 202 (pS199/202; ThermoFisher Scientific, 44-768G)  
520 are commercially available. All experiments with C05-01, C05-03, C05-05, <sup>18</sup>F-C05-05,  
521 PBB3, <sup>11</sup>C-PBB3, PM-PBB3, and <sup>18</sup>F- PM-PBB3 were performed under UV-cut light to  
522 avoid photo-isomerization of these compounds (22).

### 523 **Postmortem brain tissues**

524 Postmortem human brains were obtained from autopsies carried out at the Department of  
525 Neuroscience of the Mayo Clinic on patients with DLB and MSA, at the Center for  
526 Neurodegenerative Disease Research of the University of Pennsylvania Perelman School  
527 of Medicine on patients with AD, and at the Department of Pathology of Niigata  
528 University on patients with PDD. Tissues for homogenate binding assays were frozen, and  
529 tissues for histochemical, immunohistochemical and autoradiographic labeling were  
530 frozen or fixed in 10% neutral buffered formalin followed by embedding in paraffin  
531 blocks.

### 532 **Preparation of recombinant $\alpha$ -synuclein and fibrils**

533 Recombinant mouse and marmoset wild-type  $\alpha$ -synuclein and fibrils were prepared as  
534 described previously (11, 37, 65). Briefly, purified  $\alpha$ -synuclein (7 -10 mg/ml) was  
535 incubated at 37°C in a shaking incubator at 200 rpm in 30 mM Tris-HCl, pH 7.5,  
536 containing 0.1% NaN<sub>3</sub>, for 72 hours.  $\alpha$ -synuclein fibrils were pelleted by spinning the  
537 assembly mixtures at 113,000  $\times$  g for 20 min, resuspended in saline, and sonicated for 3  
538 min (Biomic 7040 Ultrasonic Processor, Seiko). Protein concentrations were determined  
539 by high performance liquid chromatography (HPLC) and adjusted to 4 mg/ml by dilution  
540 with saline.

### 541 **Virus preparation**

542 A recombinant adeno associated virus (AAV) was prepared in HEK293T cells by  
543 polyethylenimine mediated co-transfection of AAV transfer vector encoding mCherry  
544 with rat Synapsin promoter and AAV serotype DJ packaging plasmids, pHelper and pRC-  
545 DJ (Cell Biolabs Inc.), as described previously (66). 48 hours after transfection, cells were  
546 harvested and lysed in 20 mM HEPES-NaOH, pH 8.0, 150mM NaCl buffer supplemented  
547 with 0.5% sodium deoxyholate and 50 units/mL benzonase nuclease (Sigma-Aldrich).  
548 AAV particles were next purified with HiTrap heparin column (GE Healthcare) and virus  
549 titer was determined by AAVpro® Titration kit (for Real Time PCR) ver2 (TaKaRa).

### 550 **Stereotaxic surgery**

551 For histochemistry, *ex vivo* examination and *in vivo* longitudinal imaging by two-photon  
552 laser scanning, nine-week-old mice anesthetized with 1.5% (v/v) isoflurane were  
553 unilaterally injected with 3  $\mu$ l of recombinant mouse  $\alpha$ -synuclein fibrils or 3  $\mu$ l of saline  
554 into striatum (Interaural 3.82 mm, Lateral 2.0 mm, Depth 2.0 mm) via glass capillary. For  
555 PET study and *ex vivo* autoradiography, nine-week-old mice anesthetized with 1.5% (v/v)  
556 isoflurane were bilaterally injected with 3  $\mu$ l of recombinant mouse  $\alpha$ -synuclein fibrils or 3  
557  $\mu$ l of saline into striatum. For *in vivo* evaluation of ligands by two-photon laser scanning,  
558 mice anesthetized with 1.5% (v/v) isoflurane were unilaterally injected with 3  $\mu$ l of  
559 recombinant mouse  $\alpha$ -synuclein fibrils into somatosensory cortex (Interaural 1.98 mm,  
560 Lateral 2.5 mm, Depth 0.375 mm). For double inoculation of  $\alpha$ -synuclein fibrils and AAV,  
561 nine-week-old mice anesthetized with 1.5% (v/v) isoflurane were unilaterally injected  
562 with 1  $\mu$ l of purified AAV stock into somatosensory cortex (Interaural 1.98 mm, Lateral  
563 2.5 mm, Depth 0.375 mm) and 3  $\mu$ l of recombinant mouse  $\alpha$ -synuclein fibrils into  
564 striatum.

565 In the marmoset, surgeries were performed under aseptic conditions in fully equipped  
566 operating suite. We monitored body temperature, heart rate and SpO<sub>2</sub> throughout all  
567 surgical procedures. The marmoset (2 years old at the time of surgery) was immobilized  
568 by intramuscular injection of ketamine (5-10 mg/kg) and xylazine (0.2-0.5 mg/kg) and  
569 intubated by endotracheal tube. Anesthesia was maintained with isoflurane (1-3%, to  
570 effect). Prior to surgery, MRI (20 cm bore, Biospec, Avance-III system; Bruker Biospin)  
571 and X-ray computed tomography (CT) scans (Accuitomo170, J. MORITA CO.) were  
572 performed under anesthesia (isoflurane 1-3%, to effect). Overlay MR and CT images were  
573 created using PMOD image analysis software (PMOD Technologies Ltd) to estimate  
574 stereotaxic coordinates of target brain structures. For injections, the marmoset underwent  
575 surgical procedure to open burr holes (~3 mm diameter) for the injection needle.  
576 Recombinant marmoset  $\alpha$ -synuclein fibrils (right hemisphere, total 100  $\mu$ l; 50  $\mu$ l  $\times$  2  
577 regions) and saline (left hemisphere, total 100  $\mu$ l; 50  $\mu$ l  $\times$  2 regions) were pressure-  
578 injected into caudate nucleus (Interaural 9.75 mm) and putamen (Interaural 9.75 mm) by  
579 Hamilton syringe mounted into motorized microinjector (UMP3T-2, WPI) held by  
580 manipulator (Model 1460, David Kopf, Ltd.) on a stereotaxic frame.

### 581 ***Ex vivo* fluorescence examination**

582 Mice were anesthetized with 1.5% (v/v) isoflurane and intraperitoneally administered BF-  
583 227 (1.66 mg/kg) and C05-05 (1.66 mg/kg). 2 hours after administration of BF-227 (25)  
584 and 90 min after administration of C05-05, mice were then sacrificed by cervical  
585 dislocation, and brains were removed. After quick freezing by powdered dry ice, 20- $\mu$ m  
586 thick frozen sections were prepared by cryostat and mounted in non-fluorescent mounting  
587 media (VECTASHIELD; Vector Laboratories). Fluorescence images of brain section with  
588 no additional staining were captured by DM4000 microscope (Leica) equipped with  
589 custom filter cube (excitation band-pass at 414/23 nm and suppression low-pass with 458  
590 nm cut-off) and BZ-X710 fluorescence microscope (KEYENCE) equipped with Filter set  
591 ET-ECFP (Chroma Technology). For immunostaining, sections used for *ex vivo*  
592 examination were fixed in 4% paraformaldehyde in phosphate buffered saline (PBS)  
593 overnight at 4°C just prior to staining.

### 594 **Two-photon laser-scanning microscopy**



595 For surgical procedure, animals were anesthetized with a mixture of air, oxygen and  
596 isoflurane (3-5% W/V for induction and 2% W/V for surgery) via a facemask, and a  
597 cranial window (4.5-5 mm in diameter) was attached over the right somatosensory cortex,  
598 centered at 2.5 mm caudal and 2.5 mm lateral from bregma (67). Two-photon imaging  
599 was performed in awake mice two weeks after cranial window surgery at the earliest.  
600 Sulforhodamine 101 dissolved in saline (5 mM) was intraperitoneally administered (4  $\mu$ l/g  
601 body weight) just before initiation of imaging experiments, and 0.05 mg of C05-05, C05-  
602 01, and PBB3 dissolved in dimethyl sulfoxide : saline = 1 : 1 (0.05% W/V) was  
603 intraperitoneally administered at various time points. Animals were placed on a custom-  
604 made apparatus, and real-time imaging was conducted by two-photon laser scanning  
605 microscopy (TCS-SP5 MP, Leica) with an excitation wavelength of 850-900 nm. In  
606 evaluation of *in vivo* labeling of  $\alpha$ -synuclein inclusions with ligands, two-photon imaging  
607 was performed before and 5, 30, 60, and 90 min after administration of ligands. In *in vivo*  
608 longitudinal imaging of  $\alpha$ -synuclein inclusions with C05-05, two-photon imaging was  
609 performed 90 min after administration of C05-05. An emission signal was separated by  
610 beam splitter (560/10 nm) and simultaneously detected through band-pass filter for ligands  
611 (525/50 nm) and sulforhodamine 101 and mCherry (610/75 nm). A single image plane  
612 consisted of 1024 $\times$ 1024 pixels, with in-plane pixel size of 0.45  $\mu$ m. Volume images were  
613 acquired up to maximum depth of 200-500  $\mu$ m from cortical surface with z-step size of 2.5  
614  $\mu$ m.

## 515 Radiosynthesis

516  $^{11}$ C-PE2I,  $^{11}$ C-PBB3,  $^{18}$ F-PM-PBB3, and  $^{18}$ F-C05-01 were radiosynthesized using their  
517 desmethyl, tosylate or nitro precursors as described previously (16, 22, 56, 68, 69).  
518 Radiolabeling of  $^{18}$ F-C05-05 was accomplished by ring-opening reaction of (rac)- $^{18}$ F-  
519 epifluorohydrin with a phenolic precursor (C05-03) in the presence of 1.0 N NaOH and  
520 dimethylformamide at 130 $^{\circ}$ C for 20 min as described in fig. S5 (70). After  
521 fluoroalkylation, the crude reaction mixture was transferred into a reservoir for preparative  
522 HPLC using Atlantis Prep T3 column (10  $\times$  150 mm, Waters) with a mobile phase  
523 consisting of acetonitrile/water (25/75) with 0.1% trifluoroacetic acid (v/v) at a flow rate  
524 of 5 ml/min. The fraction corresponding to  $^{18}$ F-C05-05 was collected in a flask containing  
525 100  $\mu$ l of 25% ascorbic acid solution and Tween 80, and was evaporated to dryness under  
526 a vacuum. The residue was dissolved in 3 ml of saline (pH 7.4) to obtain  $^{18}$ F-C05-05. The  
527 final formulated product was chemically and radiochemically pure (>95%) as detected by  
528 analytical HPLC using Atlantis Prep T3 column (4.6  $\times$  150 mm, Waters) with mobile  
529 phase consisting of acetonitrile/water (30/70) with 0.1% trifluoroacetic acid (v/v) at a flow  
530 rate of 1 ml/min. Specific activity of  $^{18}$ F-C05-05 at the end of synthesis was 218-260  
531 GBq/ $\mu$ mol, and  $^{18}$ F-C05-05 maintained its radioactive purity exceeding 90% for over 3  
532 hours after formulation.

## 533 PET imaging

534 PET scans were performed by microPET Focus 220 scanner (Siemens Medical Solutions).  
535 Mice were anesthetized with 1.5-2.0% isoflurane during all PET procedures. Emission  
536 scans were acquired for 90 and 120 min in 3D list mode with an energy window of 350-  
537 750 keV immediately after intravenous injection of  $^{18}$ F-C05-01 ( $23.5 \pm 0.2$  MBq) and  $^{18}$ F-  
538 C05-05 ( $30.8 \pm 0.4$  MBq), respectively. Images were reconstructed by either maximum a  
539 posteriori methods or filtered back projection by 0.5 mm Hanning filter. All image data  
540 were subsequently analyzed using PMOD software (PMOD Technologies). For spatial



541 alignment of PET images, template MRI images generated previously (71) were used in  
542 this study. Volumes of interest (VOIs) were manually placed on the striatum, cortex,  
543 amygdala and cerebellum. The marmoset was anesthetized with 1-3% isoflurane during all  
544 PET procedures. Transmission scans were performed for about 20 min with a Ge-68  
545 source. Emission scans were acquired for 120 min and 90 min in 3D list mode with an  
546 energy window of 350-750 keV after intravenous bolus injection of  $^{18}\text{F}$ -C05-05 ( $89.6 \pm$   
547  $15.3$  MBq) and  $^{11}\text{C}$ -PE2I ( $89.2 \pm 2.0$  MBq), respectively. All list-mode data were sorted  
548 into 3D sinograms, which were then Fourier-rebinned into 2D sinograms. Images were  
549 thereafter reconstructed with filtered back projection using a Hanning filter cut-off at  
550 Nyquist frequency ( $0.5 \text{ mm}^{-1}$ ). All image data were subsequently analyzed using PMOD  
551 software. VOIs were placed on the caudate nucleus, putamen and cerebellum with  
552 reference to standard marmoset brain MR image (72).

553 After anatomical standardization, decay-corrected time-activity curves in each of the VOIs  
554 were generated as the regional concentration of radioactivity averaged across the specific  
555 time window after radioligand injection. In the striatum and cortex, uptake value ratio to  
556 the cerebellum was calculated. To quantify  $^{11}\text{C}$ -PE2I binding,  $\text{BP}_{\text{ND}}$  was calculated with a  
557 simplified reference tissue model using the cerebellum as a reference region, and the  
558 caudate nucleus and the putamen as signal-rich regions.

## 559 **Histological examination**

560 Mice were deeply anesthetized and sacrificed by saline perfusion, and brains were  
561 subsequently dissected and fixed in 4% paraformaldehyde in PBS overnight at  $4^{\circ}\text{C}$ . After  
562 cryo-protection in PBS containing 20% sucrose, brains were embedded and frozen in OCT  
563 compound (SaKuRa), and 20- $\mu\text{m}$  thick fixed frozen sections were prepared by cryostat.  
564 The marmoset was deeply anesthetized with an overdose of sodium pentobarbital (80  
565 mg/kg, intravenous administration) and transcardially perfused with saline at  $4^{\circ}\text{C}$ ,  
566 followed by 4% paraformaldehyde in PBS, pH 7.4. The brain was removed from the skull,  
567 postfixed in the same fresh fixative overnight, saturated with 30% sucrose in phosphate  
568 buffer at  $4^{\circ}\text{C}$ , and then cut serially into 40- $\mu\text{m}$ -thick sections on a freezing microtome. For  
569 fluorescence labeling with ligands, mouse fixed frozen sections, marmoset fixed sections,  
570 6- $\mu\text{m}$  thick deparaffinized postmortem human brain sections and 20- $\mu\text{m}$  thick fresh frozen  
571 human brain sections post-fixed in 4% paraformaldehyde in PBS were incubated in 20%  
572 and 50% ethanol containing 30  $\mu\text{M}$  ligand, respectively, at room temperature for 30 min.  
573 The samples were rinsed with 20% or 50% ethanol for 5 min, dipped into distilled water  
574 twice for 3 min each, and mounted in VECTASHIELD. Fluorescence images were  
575 captured by a DM4000 microscope equipped with a custom filter cube and a BZ-X710  
576 fluorescence microscope equipped with Filter set ET-ECFP. Sections labeled with ligands  
577 in fluorescence microscopy, *ex vivo* examination and autoradiography and their adjacent  
578 sections were immunostained with pS129, LB509, pS199/202, and AT8 antibodies with  
579 antigen retrieval by autoclaving, and with 6E10 antibodies with antigen retrieval by formic  
580 acid. Immunolabeling was then examined using DM4000 and BZ-X710. Images were  
581 analyzed using ImageJ software (NIH Image).

## 582 **Autoradiography**

583 *In vitro* autoradiography was performed using 6- $\mu\text{m}$ -thick deparaffinized sections derived  
584 from MSA brains, 20- $\mu\text{m}$ -thick fresh frozen sections post-fixed in 4% paraformaldehyde  
585 in PBS derived from DLB and PDD brains, and 40- $\mu\text{m}$ -thick fixed sections derived from

586  $\alpha$ -Syn marmoset. For labeling with  $^{18}\text{F}$ -C05-05, sections were pre-incubated in 50 mM  
587 Tris-HCl buffer, pH 7.4, containing 20% ethanol at room temperature for 30 min, and  
588 incubated in 50 mM Tris-HCl buffer, pH 7.4, containing 20% ethanol and  $^{18}\text{F}$ -C05-05 (10  
589 nM; specific radioactivity: 260 GBq/ $\mu\text{mol}$ ) at room temperature for 60 min. Excess  
590 concentration (10  $\mu\text{M}$ ) of C05-05 was added to the reaction to determine nonspecific  
591 radioligand binding. The samples were then rinsed with ice-cold Tris-HCl buffer  
592 containing 20% ethanol twice for 2 min, and dipped into ice-cold water for 10 sec. The  
593 sections labeled with  $^{18}\text{F}$ -C05-05 were subsequently dried with warm air, and exposed to  
594 an imaging plate (BAS-MS2025; Fuji Film). *Ex vivo* autoradiography was performed in  
595 mice used in PET imaging. Mice were anesthetized with 1.5% (v/v) isoflurane and  
596 intravenously administrated  $^{18}\text{F}$ -C05-05 ( $27.8 \pm 0.2$  MBq, specific radioactivity: 63  
597 GBq/ $\mu\text{mol}$ ). 90 min after administration of  $^{18}\text{F}$ -C05-05, mice were then sacrificed by  
598 cervical dislocation, and the brains were removed. After quick freezing with powdered dry  
599 ice, 20- $\mu\text{m}$  thick frozen sections were prepared by cryostat and exposed to an imaging  
700 plate. The imaging plate was scanned by BAS-5000 system (Fuji Film) to acquire  
701 autoradiograms. Images were analyzed using Multi Gauge software (Fuji Film).

### 702 ***In vitro* binding assay**

703 Frozen tissues derived from the amygdala of a DLB patient and the frontal cortex of an  
704 AD patient were homogenized in 50 mM Tris-HCl buffer, pH 7.4, containing protease  
705 inhibitor cocktail (cOmplete<sup>TM</sup>, EDTA-free; Roche), and stored at  $-80^\circ\text{C}$  until analyses.  
706 To assay radioligand binding with homologous blockade, these homogenates (100  $\mu\text{g}$   
707 tissue) were incubated with 5 nM  $^{18}\text{F}$ -C05-05 (specific radioactivity: 63 GBq/ $\mu\text{mol}$ ), 5 nM  
708  $^{11}\text{C}$ -PBB3 (specific radioactivity:  $93.4 \pm 24$  GBq/ $\mu\text{mol}$ ), or 1 nM  $^{18}\text{F}$ -PM-PBB3 (specific  
709 radioactivity:  $183.3 \pm 89.2$  GBq/ $\mu\text{mol}$ ) in the absence or presence of non-radiolabeled  
710 C05-05, PBB3, or PM-PBB3 at varying concentrations ranging from  $1 \times 10^{-11}$  to  $5 \times 10^{-7}$  M  
711 in Tris-HCl buffer containing 10% ethanol, pH 7.4, for 30 min at room temperature. Non-  
712 specific binding of  $^{18}\text{F}$ -C05-05,  $^{11}\text{C}$ -PBB3, and  $^{18}\text{F}$ -PM-PBB3 was determined in the  
713 presence of  $5 \times 10^{-7}$  M C05-05, PBB3, and PM-PBB3, respectively. Samples were run in  
714 quadruplicate. To assay radioligand binding with heterologous blockade, the DLB  
715 amygdala and AD frontal cortex homogenates (100  $\mu\text{g}$  tissue) were incubated with 5 nM  
716  $^{18}\text{F}$ -C05-05 (specific radioactivity: 201 GBq/ $\mu\text{mol}$ ) in the absence or presence of  
717 clorgiline and selegiline at varying concentrations ranging from  $1 \times 10^{-11}$  to  $5 \times 10^{-7}$  M in  
718 Tris-HCl buffer containing 10% ethanol, pH 7.4, for 30 min at room temperature.  
719 Concentration of the competitor inducing 50% inhibition (IC<sub>50</sub>) was determined by using  
720 non-linear regression to fit a concentration-binding plot to one-site and two-site binding  
721 models derived from the Cheng-Prusoff equation with GraphPad Prism version 5.0  
722 (GraphPad Software), followed by F-test for model selection.

### 723 **Radiometabolite analysis in mice**

724  $^{18}\text{F}$ -C05-05 ( $23.2 \pm 6.2$  MBq, specific radioactivity:  $320.5 \pm 10.6$  GBq/ $\mu\text{mol}$ ) was  
725 intravenously applied to awake C57BL/6J mice (male, six-month-old). Mice were  
726 decapitated at 5, 30, 60, and 90 min after  $^{18}\text{F}$ -C05-05 application, respectively, and blood  
727 and brain samples were collected accordingly. For blood samples, after centrifugation at  
728 15,000g for 2 min at  $4^\circ\text{C}$ , the resulting plasma (100  $\mu\text{l}$ ) was mixed with 150  $\mu\text{l}$  of  
729 acetonitrile/Methanol (100/50) and centrifuged at 15,000g for 2 min at  $4^\circ\text{C}$  for  
730 deproteinization. Then an aliquot of the supernatant was collected for HPLC analysis. For  
731 brain samples, the whole brain was homogenized in 1 ml of ice-cold saline. The resulting

732 homogenate (100  $\mu$ l) was mixed with 150  $\mu$ l of acetonitrile/Methanol (100/50) and  
733 centrifuged at 15,000g for 2 min at 4°C for deproteinization. The supernatant of each brain  
734 homogenate was subjected to HPLC analysis. The plasma and brain samples were  
735 analyzed by reverse-phase HPLC system (JASCO Corporation). The columns used were  
736 Capcell PAK UG80 C18 (5  $\mu$ m, 4.6 mm i.d.  $\times$  250 mm, OSAKA Soda). The mobile phase  
737 was acetonitrile/50 mM ammonium acetate solution (55/45) at an isocratic condition, and  
738 the flow rate was 1.0 ml/min. Effluent radioactivity was detected with a home-made NaI  
739 (TI) scintillation detector system (73). The retention time of the radiochromatography  
740 peak of  $^{18}$ F-C05-05 was identified by the optical absorption of standard C05-05 at a  
741 detection wavelength of 390 nm. The metabolite and unmetabolized fraction was  
742 calculated as the peak area ratio to the total peaks detected.

### 743 **Statistical Analysis**

744 Statistical significance of the data was analyzed with GraphPad Prism version 5.0. For  
745 comparison of multiple groups, data were analyzed by one-way ANOVA with post-hoc  
746 Tukey's HSD test. For comparison of multiple groups and regions, data were analyzed by  
747 two-way repeated-measures ANOVA with Bonferroni's post hoc analysis.

### 748 **References**

- 751 1. M.G. Spillantini, R.A. Crowther, R. Jakes, M. Hasegawa, M. Goedert, alpha-Synuclein in  
752 filamentous inclusions of Lewy bodies from Parkinson's disease and dementia with Lewy  
753 bodies. *Proc. Natl. Acad. Sci. U. S. A.* **95**, 6469-6473 (1998).
- 754 2. M. Baba, S. Nakajo, P.H. Tu, T. Tomita, K. Nakaya, V.M. Lee, J.Q. Trojanowski, T.  
755 Iwatsubo, Aggregation of alpha-synuclein in Lewy bodies of sporadic Parkinson's disease and  
756 dementia with Lewy bodies. *Am. J. Pathol.* **152**, 879-884 (1998).
- 757 3. M. Goedert, Alpha-synuclein and neurodegenerative diseases. *Nat. Rev. Neurosci.* **2**, 492-  
758 501 (2001).
- 759 4. M.G. Spillantini, R.A. Crowther, R. Jakes, N.J. Cairns, P.L. Lantos, M. Goedert,  
760 Filamentous alpha-synuclein inclusions link multiple system atrophy with Parkinson's disease  
761 and dementia with Lewy bodies. *Neurosci. Lett.* **251**, 205-208 (1998).
- 762 5. K. Wakabayashi, S. Hayashi, A. Kakita, M. Yamada, Y. Toyoshima, M. Yoshimoto, H.  
763 Takahashi, Accumulation of alpha-synuclein/NACP is a cytopathological feature common to  
764 Lewy body disease and multiple system atrophy. *Acta Neuropathol.* **96**, 445-452 (1998).
- 765 6. L.C. Serpell, J. Berriman, R. Jakes, M. Goedert, R.A. Crowther, Fiber diffraction of  
766 synthetic alpha-synuclein filaments shows amyloid-like cross-beta conformation. *Proc. Natl.*  
767 *Acad. Sci. U. S. A.* **97**, 4897-4902 (2000).
- 768 7. M. Schweighauser, Y. Shi, A. Tarutani, F. Kametani, A.G. Murzin, B. Ghetti, T.  
769 Matsubara, T. Tomita, T. Ando, K. Hasegawa, S. Murayama, M. Yoshida, M. Hasegawa,  
770 S.H.W. Scheres, M. Goedert, Structures of  $\alpha$ -Synuclein filaments from multiple system  
771 atrophy. *Nature* **585**, 464-469 (2020).
- 772  
773  
774  
775  
776  
777  
778

- 779 8. K.C. Luk, V. Kehm, J. Carroll, B. Zhang, P. O'Brien, J.Q. Trojanowski, V.M. Lee,  
780 Pathological  $\alpha$ -synuclein transmission initiates Parkinson-like neurodegeneration in  
781 nontransgenic mice. *Science* **338**, 949-953 (2012).
- 782  
783 9. K.C. Luk, V. Kehm, J. B. Zhang, P. O'Brien, J.Q. Trojanowski, V.M. Lee, Intracerebral  
784 inoculation of pathological  $\alpha$ -synuclein initiates a rapidly progressive neurodegenerative  $\alpha$ -  
785 synucleinopathy in mice. *J. Exp. Med.* **209**, 975-986 (2012).
- 786  
787 10. M. Masuda-Suzukake, T. Nonaka, M. Hosokawa, T. Oikawa, T. Arai, H. Akiyama, D.M.  
788 Mann, M. Hasegawa, Prion-like spreading of pathological  $\alpha$ -synuclein in brain. *Brain* **136**,  
789 1128-1138 (2013).
- 790  
791 11. M. Masuda-Suzukake, T. Nonaka, M. Hosokawa, M. Kubo, A. Shimozawa, H. Akiyama,  
792 M. Hasegawa, Pathological alpha-synuclein propagates through neural networks. *Acta*  
793 *Neuropathol. Commun.* **2**, 88 (2014).
- 794  
795 12. H. Braak, K. Del Tredici, U. Rüb, R.A. de Vos, E.N. Jansen Steur, E. Braak, Staging of  
796 brain pathology related to sporadic Parkinson's disease. *Neurobiol. Aging* **24**, 197-211 (2003).
- 797  
798 13. Y. Saito, A. Kawashima, N.N. Ruberu, H. Fujiwara, S. Koyama, M. Sawabe, T. Arai, H.  
799 Nagura, H. Yamanouchi, M. Hasegawa, T. Iwatsubo, S. Murayama, Accumulation of  
800 phosphorylated alpha-synuclein in aging human brain. *J. Neuropathol. Exp. Neurol.* **62**, 644-  
801 654 (2003).
- 802  
803 14. M.X. Henderson, J.Q. Trojanowski, V.M. Lee,  $\alpha$ -synuclein pathology in Parkinson's  
804 disease and related  $\alpha$ -synucleinopathies. *Neurosci. Lett.* **709**, 134316 (2019).
- 805  
806 15. W.E. Klunk, H. Engler, A. Nordberg, Y. Wang, G. Blomqvist, D.P. Holt, M. Bergström, I.  
807 Savitcheva, G.F. Huang, S. Estrada, B. Ausén, M.L. Debnath, J. Barletta, J.C. Price, J.  
808 Sandell, B.J. Lopresti, A. Wall, P. Koivisto, G. Mathis, B. Långström, Imaging brain amyloid  
809 in Alzheimer's disease with Pittsburgh Compound-B. *Ann. Neurol.* **55**, 306-319 (2004).
- 810  
811 16. M. Maruyama, H. Shimada, T. Suhara, H. Shinotoh, B. Ji, J. Maeda, M.R. Zhang, J.Q.  
812 Trojanowski, V.M. Lee, M. Ono, K. Masamoto, H. Takano, N. Sahara, N. Iwata, N. Okamura,  
813 S. Furumoto, Y. Kudo, Q. Chang, T. C. Saido, A. Takashima, J. Lewis, M. K. Jang, I. Aoki,  
814 H. Ito, M. Higuchi, Imaging of tau pathology in a tauopathy mouse model and in Alzheimer  
815 patients compared to normal controls. *Neuron* **79**, 1094-1108 (2013).
- 816  
817 17. D.T. Chien, A.K. Szardenings, S. Bahri, J.C. Walsh, F. Mu, C. Xia, W.R. Shankle, A.J.  
818 Lerner, M.Y. Su, A. Elizarov, H.C. Kolb, Early clinical PET imaging results with the novel  
819 PHF-tau radioligand [F-18]-T808. *J. Alzheimers Dis.* **38**, 171-184 (2014).
- 820  
821 18. D.F. Wong, R.A. Comley, H. Kuwabara, P.B. Rosenberg, S.M. Resnick, S. Ostrowitzki,  
822 C. Vozzi, F. Boess, E. Oh, C.G. Lyketsos, M. Honer, L. Gobbi, G. Klein, N. George, L.  
823 Gapasin, K. Kitzmiller, J. Roberts, J. Seigny, A. Nandi, J. Brasic, C. Mishra, M.  
824 Thambisetty, A. Moglekar, A. Mathur, M. Albert, R.F. Dannals, E. Borroni, Characterization  
825 of 3 Novel Tau Radiopharmaceuticals,  $^{11}\text{C}$ -RO-963,  $^{11}\text{C}$ -RO-643, and  $^{18}\text{F}$ -RO-948, in Healthy  
826 Controls and in Alzheimer Subjects. *J. Nucl. Med.* **59**, 1869-1876 (2018).
- 827



328 19. T.J. Betthausen, K.A. Cody, M.D. Zammit, D. Murali, A.K. Converse, T.E. Barnhart, C.K.  
329 Stone, H.A. Rowley, S.C. Johnson, B.T. Christian, In Vivo Characterization and  
330 Quantification of Neurofibrillary Tau PET Radioligand <sup>18</sup>F-MK-6240 in Humans from  
331 Alzheimer Disease Dementia to Young Controls. *J. Nucl. Med.* **60**, 93-99 (2019).

332  
333 20. A. Mueller, S. Bullich, O. Barret, J. Madonia, M. Berndt, C. Papin, A. Perrotin, N. Koglin,  
334 H. Kroth, A. Pfeifer, G. Tamagnan, J.P. Seibyl, K. Marek, S. de Santi, L.M. Dinkelborg, A.W.  
335 Stephens, Tau PET imaging with <sup>18</sup>F-PI-2620 in patients with Alzheimer's disease and  
336 healthy controls: a first-in-human study. *J. Nucl. Med.* **61**, 911-919 (2020).

337  
338 21. S. Sanabria Bohórquez, J. Marik, A. Ogasawara, J.N. Tinianow, H.S. Gill, O. Barret, G.  
339 Tamagnan, D. Alagille, G. Ayalon, P. Manser, T. Bengtsson, M. Ward, S.P. Willians, G.A.  
340 Kerchner, J.P. Seibyl, K. Marek, R.M. Weimer, [<sup>18</sup>F]GTP1 (Genentech Tau Probe 1), a  
341 radioligand for detecting neurofibrillary tangle tau pathology in Alzheimer's disease. *Eur. J.*  
342 *Nucl. Med. Mol. Imaging* **46**, 2077-2089 (2019).

343  
344 22. K. Tagai, M. Ono, M. Kubota, S. Kitamura, K. Takahata, C. Seki, Y. Takado, H.  
345 Shinotoh, Y. Sano, Y. Yamamoto, K. Matsuoka, H. Takuwa, M. Shimojo, M. Takahashi, K.  
346 Kawamura, T. Kikuchi, M. Okada, H. Akiyama, H. Suzuki, M. Onaya, T. Takeda, K. Arai, N.  
347 Arai, N. Araki, Y. Saito, J. Q. Trojanowski, V. M.-Y. Lee, S. K. Mishra, Y. Yamaguchi, Y.  
348 Kimura, M. Ichise, Y. Tomita, M.-R. Zhang, T. Suhara, M. Shigeta, N. Sahara, M. Higuchi,  
349 H. Shimada, High-contrast in vivo imaging of tau pathologies in Alzheimer's and non-  
350 Alzheimer's disease tauopathies. *Neuron* **109**, 42-58 (2021).

351  
352 23. L. Kuebler, S. Buss, A. Leonov, S. Ryazanov, F. Schmidt, A. Maurer, D. Weckbecker,  
353 A.M. Landau, T.P. Lillethorup, D. Bleher, R.S. Saw, B.J. Pichler, C. Griesinger, A. Giese, K.  
354 Herfert, [<sup>11</sup>C]MODAG-001-towards a PET tracer targeting  $\alpha$ -synuclein aggregates. *Eur. J.*  
355 *Nucl. Med. Mol. Imaging* doi:10.1007/s00259-020-05133-x (2020).

356  
357 24. A. Maurer, A. Leonov, S. Ryazanov, K. Herfert, L. Kuebler, S. Buss, F. Schmids, D.  
358 Weckbecker, R. Linder, D. Bender, A. Giese, B.J. Pichler, C. Griesinger, <sup>11</sup>C Radiolabeling of  
359 anle253b: a Putative PET Tracer for Parkinson's Disease That Binds to  $\alpha$ -Synuclein Fibrils in  
360 vitro and Crosses the Blood-Brain Barrier. *ChemMedChem* **15**, 411-415 (2020).

361  
362 25. Y. Kudo, N. Okamura, S. Furumoto, M. Tashiro, K. Furukawa, M. Maruyama, M. Ito, R.  
363 Iwata, K. Yanai, H. Arai, 2-(2-[2-Dimethylaminothiazol-5-yl]ethenyl)-6- (2-  
364 [fluoro]ethoxy)benzoxazole: a novel PET agent for in vivo detection of dense amyloid  
365 plaques in Alzheimer's disease patients. *J. Nucl. Med.* **48**, 553-561 (2007).

366  
367 26. A. Kikuchi, A. Takeda, N. Okamura, M. Tashiro, T. Hasegawa, S. Furumoto, M.  
368 Kobayashi, N. Sugeno, T. Baba, Y. Miki, F. Mori, K. Wakabayashi, Y. Funaki, R. Iwata, S.  
369 Takahashi, H. Fukuda, H. Arai, Y. Kudo, K. Yanai, Y. Itoyama, In vivo visualization of  
370 alpha-synuclein deposition by carbon-11-labelled 2-[2-(2-dimethylaminothiazol-5-  
371 yl)ethenyl]-6-[2-(fluoro)ethoxy]benzoxazole positron emission tomography in multiple  
372 system atrophy. *Brain* **133**, 1772-1778 (2010).

373  
374 27. M. Verdurand, E. Levigoureux, S. Lancelot, W. Zeinyeh, T. Billard, I. Quadrio, A. Perret-  
375 Liaudet, L. Zimmer, F. Chauveau, Amyloid-Beta Radiotracer [<sup>18</sup>F]BF-227 Does Not Bind to  
376 Cytoplasmic Glial Inclusions of Postmortem Multiple System Atrophy Brain Tissue. *Contrast*  
377 *Mol. Imaging* **2018**, 9165458 (2018).



- 378  
379 28. S. Koga, M. Ono, N. Sahara, M. Higuchi, D.W. Dickson, Fluorescence and  
380 autoradiographic evaluation of tau PET ligand PBB3 to  $\alpha$ -synuclein pathology. *Mov. Disord.*  
381 **32**, 884-892 (2017).  
382
- 383 29. A. Perez-Soriano, J.E. Arena, K. Dinelle, Q. Miao, J. McKenzie, N. Neilson, A.  
384 Puschmann, P. Schaffer, H. Shinotoh, J. Smith-Forrester, E. Shahinfard, N. Vafai, D. Wile, Z.  
385 Wszolek, M. Higuchi, V. Sossi, A.J. Stoessl, PBB3 imaging in Parkinsonian disorders:  
386 Evidence for binding to tau and other proteins. *Mov. Disord.* **32**, 1016-1024 (2017).  
387
- 388 30. M. Ono, N. Sahara, K. Kumata, B. Ji, R. Ni, S. Koga, D. W. Dickson, J. Q. Trojanowski,  
389 V. M. Lee, M. Yoshida, I. Hozumi, Y. Yoshiyama, J. C. van Swieten, A. Nordberg, T. Suhara,  
390 M. R. Zhang, M. Higuchi, Distinct binding of PET ligands PBB3 and AV-1451 to tau fibril  
391 strains in neurodegenerative tauopathies. *Brain* **140**, 764-780 (2017).  
392
- 393 31. A.W.P. Fitzpatrick, B. Falcon, S. He, A.G. Murzin, G. Murshudov, H.J. Garringer, R.A.  
394 Crowther, B. Ghetti, M. Goedert, S.H.W. Scheres, Cryo-EM structures of tau filaments from  
395 Alzheimer's disease. *Nature* **547**, 185-190 (2017).  
396
- 397 32. M. Goedert, Y. Yamaguchi, S.K. Mishra, M. Highchi, N. Sahara, Tau Filaments and the  
398 Development of Positron Emission Tomography Tracers. *Front. Neurol.* **9**, 70 (2018).  
399
- 300 33. B. Falcon, W. Zhang, A.G. Murzin, G. Murshudov, H.J. Garringer, R. Vidal, R.A.  
301 Crother, B. Ghetti, S.H.W. Scheres, M. Goedert, Structures of filaments from Pick's disease  
302 reveal a novel tau protein fold. *Nature* **561**, 137-140 (2018).  
303
- 304 34. R. Guerrero-Ferreira, N.M. Taylor, D. Mona, P. Ringler, M.E. Lauer, R. Riek, M.  
305 Britschgi, H. Stahlberg, Cryo-EM structure of alpha-synuclein fibrils. *Elife* **7**, e36402 (2018).  
306
- 307 35. R. Guerrero-Ferreira, N.M. Taylor, A.A. Arteni, P. Kumari, D. Mona, P. Ringler, M.  
308 Britschgi, M.E. Lauer, A. Makky, J. Verasdonck, R. Riek, R. Melki, B.H. Meier, A.  
309 Böckmann, L. Bousset, H. Stahlberg, Two new polymorphic structures of human full-length  
310 alpha-synuclein fibrils solved by cryo-electron microscopy. *Elife* **8**, e48907 (2019).  
311
- 312 36. P. Miranda-Azpiazu, M. Svedberg, M. Higuchi, M. Ono, Z. Jia, D. Sunnemark, C.S.  
313 Elmore, M. Schou, A. Varrone, Identification and *in vitro* characterization of C05-01, a PBB3  
314 derivative with improved affinity for alpha-synuclein. *Brain Res.* **1749**, 147131 (2020).  
315
- 316 37. A. Shimozawa, M. Ono, D. Takahara, A. Tarutani, S. Imura, M. Masuda-Suzukake, M.  
317 Higuchi, K Yanai, S Hisanaga, M Hasegawa, Propagation of pathological  $\alpha$ -synuclein in  
318 marmoset brain. *Acta Neuropathol. Commun.* **5**, 12 (2017).  
319
- 320 38. R.B. Innis, J.P. Seibyl, B.E. Scanley, M. Laruelle, A. Abi-Dargham, E. Wallace, R.M.  
321 Baldwin, Y. Zea-Ponce, S. Zoghbi, S. Wang, Single photon emission computed tomographic  
322 imaging demonstrates loss of striatal dopamine transporters in Parkinson disease. *Proc. Natl.*  
323 *Aced. Sci. U.S.A.* **90**, 11965-11969 (1993).  
324
- 325 39. C. Scherfler, J. Schwarz, A. Antonini, D. Grosset, F. Valldeoriola, K. Marek, W. Oertel,  
326 E. Tolosa, A.J. Lees, W. Poewe, Role of DAT-SPECT in the diagnostic work up of  
327 Parkinsonism. *Mov. Disord.* **22**, 1229-1238 (2007).

- 328  
329 40. K. Ando, S. Obayashi, Y. Nagai, A. Oh-Nishi, T. Minamimoto, M. Higuchi, T. Inoue, T.  
330 Itoh, T. Suhara, PET analysis of dopaminergic neurodegeneration in relation to immobility in  
331 the MPTP-treated common marmoset, a model for Parkinson's disease. *PLoS One* **7**, e46371  
332 (2012).  
333  
334 41. C.H. Adler, T.G. Beach, J.G. Hentz, H.A. Shill, J.N. Caviness, E. Driver-Dunckley, M.N.  
335 Sabbagh, L.I. Sue, S.A. Jacobson, C.M. Belden, B.N. Dugger, Low clinical diagnostic  
336 accuracy of early vs advanced Parkinson disease: clinicopathologic study. *Neurology* **83**, 406-  
337 412 (2014).  
338  
339 42. J. Joutsa, M. Gardberg, M. R oytt , V. Kaasinen, Diagnostic accuracy of parkinsonism  
340 syndromes by general neurologists. *Parkinsonism Relat. Disord.* **20**, 840-844 (2014).  
341  
342 43. Y.C. Wong, D. Krainc,  $\alpha$ -synuclein toxicity in neurodegeneration: mechanism and  
343 therapeutic strategies. *Nat. Med.* **23**, 1-13 (2017).  
344  
345 44. P. Brundin, K.D. Dave, J.H. Kordower, Therapeutic approaches to target alpha-synuclein  
346 pathology. *Exp. Neurol.* **298**, 225-235 (2017).  
347  
348 45. W. Zhang, A. Tarutani, K.L. Newell, A.G. Murzin, T. Matsubara, B. Falcon, R. Vidal,  
349 H.J. Garringer, Y. Shi, T. Ikeuchi, S. Murayama, B. Ghetti, M. Hasegawa, M. Goedert,  
350 S.H.W. Scheres, Novel tau filament fold in corticobasal degeneration. *Nature* **580**, 283-287  
351 (2020).  
352  
353 46. P. Desplats, H.J. Lee, E.J. Bae, C. Patrick, E. Rockenstein, L. Crews, B. Spencer, E.  
354 Masliah, S.J. Lee, Inclusion formation and neuronal cell death through neuron-to-neuron  
355 transmission of alpha-synuclein. *Proc. Natl. Aced. Sci. U.S.A.* **106**, 13010-13015 (2009).  
356  
357 47. D.G. Ordonez, M.K. Lee, M.B. Feany,  $\alpha$ -synuclein induces mitochondrial dysfunction  
358 through spectrin and the actin cytoskeleton. *Neuron* **97**, 108-124 (2018).  
359  
360 48. C. Kim, D.-H. Ho, J.-E. Suk, S. You, S. Michael, J. Kang, S.J. Lee, E. Masliah, D.  
361 Hwang, H.-J. Lee, S.-J. Lee, Neuron-released oligomeric  $\alpha$ -synuclein is an endogenous  
362 agonist of TLR2 for paracrine activation of microglia. *Nat. Commun.* **4**, 1562 (2013).  
363  
364 49. R. Gordon, E.A. Albornoz, D.C. Christie, M.R. Langley, V. Kumar, S. Mantovani, A.A.B.  
365 Robertson, M.S. Butler, D.B. Rowe, L.A. O'Neill, A.G. Kanthasamy, K. Schroder, M.A.  
366 Cooper, T.M. Woodruff, Inflammasome inhibition prevents  $\alpha$ -synuclein pathology and  
367 dopaminergic neurodegeneration in mice. *Sci. Transl. Med.* **10**, eaah4066 (2018).  
368  
369 50. M.L. Yang, L. Hasadsri, W.S. Woods, J.M. George, Dynamic transport and localization of  
370 alpha-synuclein in primary hippocampal neurons. *Mol. Neurodegener.* **5**, 9 (2010).  
371  
372 51. V.M. Nemani, W. Lu, V. Berge, K. Nakamura, B. Onoa, M.K. Lee, F.A. Chaudhry, R.A.  
373 Nicoll, R.H. Edwards, Increased expression of alpha-synuclein reduces neurotransmitter  
374 release by inhibiting synaptic vesicle reclustering after endocytosis. *Neuron* **65**, 66-79 (2010).  
375  
376 52. D. Scott, S. Roy,  $\alpha$ -Synuclein inhibits intersynaptic vesicle mobility and maintains  
377 recycling-pool homeostasis. *J. Neurosci.* **32**, 10129-10135 (2012).

53. B.K. Choi, M.G. Choi, J.Y. Kim, Y. Yang, Y. Lai, D.H. Kweon, N.K. Lee, Y.K. Shin, Large  $\alpha$ -synuclein oligomers inhibit neuronal SNARE-mediated vesicle docking. *Proc. Natl. Acad. Sci. U. S. A.* **110**, 4087-4092 (2013).
54. L. Wang, U. Das, D.A. Scott, Y. Tang, P.J. McLean, S. Roy,  $\alpha$ -synuclein multimers cluster synaptic vesicles and attenuate recycling. *Curr. Biol.* **24**, 2319-2326 (2014).
55. V. Deramecourt, S. Bombois, C.A. Maurage, A. Ghestem, H. Drobecq, E. Vanmechelen, F. Lebert, F. Pasquier, A. Delacourte, Biochemical staging of synucleinopathy and amyloid deposition in dementia with Lewy bodies. *J. Neuropathol. Exp. Neurol.* **65**, 278-288 (2006).
56. H. Hashimoto, K. Kawamura, N. Igarashi, M. Takei, T. Fujishiro, Y. Aihara, S. Shiomi, M Muto, T. Ito, K. Furutsuka, T Yamasaki, J. Yui, L. Xie, M. Ono, A. Hatori, K Nemoto, T Suhara, M. Higuchi, M. R. Zhang, Radiosynthesis, photoisomerization, biodistribution, and metabolite analysis of  $^{11}\text{C}$ -PBB3 as a clinically useful PET probe for imaging of tau pathology. *J. Nucl. Med.* **55**, 1532-1538 (2014).
57. K. Wakabayashi, M. Yoshimoto, S. Tsuji, H. Takahashi, Alpha-synuclein immunoreactivity in glial cytoplasmic inclusions in multiple system atrophy. *Neurosci. Lett.* **49**, 180-182 (1998).
58. D.W. Dickson, W. Lin, W.K. Liu, S.H. Yen, Multiple system atrophy: a sporadic synucleinopathy. *Brain Pathol.* **9**, 721-732 (1999).
59. R. Harada, A. Ishiki, H. Kai, N. Sato, K. Furukawa, S. Furumoto, T. Tago, N. Tomita, S. Watanuki, K. Hiraoka, Y. Ishikawa, Y. Funaki, T. Nakamura, T. Yoshikawa, R. Iwata, M. Tashiro, H. Sasano, T. Kitamoto, K. Yanai, H. Arai, Y. Kudo, N. Okamura, Correlations of  $^{18}\text{F}$ -THK5351 PET with post-mortem burden of tau and astrogliosis in Alzheimer's disease. *J. Nucl. Med.* **59**, 671-674 (2017).
60. K. P. Ng, T. A. Pascoal, S. Mathotaarachchi, J. Therriault, M. S. Kang, M. Shin, M. C. Guiot, Q. Guo, R. Harada, R. A. Comley, G. Massarweh, J. P. Soucy, N. Okamura, S. Gauthier, P. Rosa-Neto, Monoamine oxidase B inhibitor, selegiline, reduces  $^{18}\text{F}$ -THK5351 uptake in the human brain. *Alzheimers Res. Ther.* **9**, 25 (2017).
61. L. Lemoine, A. Leuzy, K. Chiotis, E. Rodriguez-Vieitez, A. Nordberg, Tau positron emission tomography imaging in tauopathies: The added hurdle of off-target binding. *Alzheimers Dement. (Amst)* **10**, 232-236 (2018).
62. C. Vermeiren, P. Motte, D. Viot, G. Mairet-Coello, J. P. Courade, M. Citron, J. Mercier, J. Hannestad, M. Gillard, The tau positron-emission tomography tracer AV-1451 binds with similar affinities to tau fibrils and monoamine oxidases. *Mov. Disord.* **33**, 273-281 (2018).
63. R. Ni, B. Ji, M. Ono, N. Sahara, M. R. Zhang, I. Aoki, A. Nordberg, T. Suhara, M. Higuchi, Comparative In Vitro and In Vivo Quantifications of Pathologic Tau Deposits and Their Association with Neurodegeneration in Tauopathy Mouse Models. *J. Nucl. Med.* **59**, 960-966 (2018).

027 64. D.J. Irwin, M. Grossman, D. Weintraub, H.I. Hurtig, J.E. Duda, S.X. Xie, E.B. Lee, V.M.  
028 Van Deerlin, O.L. Lopez, J.K. Kofler, P.T. Nelson, G.A. Jicha, R. Woltjer, J.F. Quinn, J.  
029 Kaya, J.B. Leverenz, D. Tsuang, K. Longfellow, D. Yearout, W. Kukull, C.D. Keene, T.J.  
030 Montine, C.P. Zabetian, J.Q. Trojanowski, Neuropathological and genetic correlates of  
031 survival and dementia onset in synucleinopathies: a retrospective analysis. *Lancet Neurol.* **16**,  
032 55-65 (2017).

033  
034 65. A. Tarutani, G. Suzuki, A. Shimozawa, T. Nonaka, H. Akiyama, S. Hisanaga, M.  
035 Hasegawa, The effect of fragmented pathogenic alpha-synuclein seeds on prion-like  
036 propagation. *J. Biol. Chem.* **291**, 18675-18688 (2016).

037  
038 66. Y. Nagai, N. Miyakawa, H. Takuwa, Y. Hori, K. Oyama, B. Ji, M. Takahashi, X. P.  
039 Huang, S. T. Slocum, J. F. DiBerto, Y. Xiong, T. Urushihata, T. Hirabayashi, A Fujimoto, K.  
040 Mimura, J. G. English, J. Liu, K. Inoue, K. Kumata, C. Seki, M. Ono, M. Shimojo, M. R.  
041 Zhang, Y. Tomita, T. Suhara, M. Takada, M. Higuchi, J. Jin, B. L. Roth, T. Minamoto,  
042 Deschloroclozapine: a potent and selective chemogenetic actuator enables rapid neuronal and  
043 behavioral modulations in mice and monkeys. *Nat. Neurosci.* **23**, 1157-1167 (2020).

044  
045 67. A. Holtmaat, T. Bonhoeffer, D.K. Chow, J. Chuckowree, V. De Paola, S.B. Hofer, M.  
046 Hübener, T. Keck, G. Knott, W.-C.A. Lee, R. Mostany, T.D. Mrsic-Flogel, E. Nedivi, C.  
047 Portera-Cailliau, K. Svoboda, J.T. Trachtenberg, L. Wilbrecht, Long-term, high-resolution  
048 imaging in the mouse neocortex through a chronic cranial window. *Nat. Protoc.* **4**, 1128-1144  
049 (2009).

050  
051 68. Y. Nagai, T. Minamoto, K. Ando, S. Obayashi, H. Ito, N. Ito, T. Suhara, Correlation  
052 between decreased motor activity and dopaminergic degeneration in the ventrolateral putamen  
053 in monkeys receiving repeated MPTP administrations: a positron emission tomography study.  
054 *Neurosci. Res.* **73**, 61-67 (2012).

055  
056 69. T. Yamasaki, M. Fujinaga, Y. Yoshida, K. Kumata, J. Yui, K. Kawamura, A. Hatori, T.  
057 Fukumura, M.R. Zhang, Radiosynthesis and preliminary evaluation of 4-[<sup>18</sup>F]fluoro-N-[4-[6-  
058 (isopropylamino)pyrimidin-4-yl]-1,3-thiazol-2-yl]-N-methylbenzamide as a new positron  
059 emission tomography ligand for metabotropic glutamate receptor subtype 1. *Bioorg. Med.*  
060 *Chem. Lett.* **21**, 2998-3001 (2011).

061  
062 70. M. Fujinaga, T. Ohkubo, T. Yamasaki, Y. Zhang, W. Mori, M. Hanyu, K. Kumata, A.  
063 Hatori, L. Xie, N. Nengaki, M.R. Zhang, Automated Synthesis of (rac)-, (R)-, and (S)-  
064 [<sup>18</sup>F]Epifluorohydrin and Their Application for Developing PET Radiotracers Containing a 3-  
065 [<sup>18</sup>F]Fluoro-2-hydroxypropyl Moiety. *ChemMedChem* **13**, 1723-1731 (2018).

066  
067 71. J. Maeda, B. Ji, T. Irie, T. Tomiyama, M. Maruyama, T. Okauchi, M. Staufenbiel, N.  
068 Iwata, M Ono, T. C. Saido, K. Suzuki, H. Mori, M. Higuchi, T. Suhara, Longitudinal,  
069 quantitative assessment of amyloid, neuroinflammation, and anti-amyloid treatment in a living  
070 mouse model of Alzheimer's disease enabled by positron emission tomography. *J. Neurosci.*  
071 **27**, 10957-10968 (2007).

072  
073 72. K. Hikishima, M.M. Quallo, Y Komaki, M Yamada, K Kawai, S Momoshima, H.J.  
074 Okano, E Sasaki, N Tamaoki, R.N. Lemon, A. Iriki, H. Okano, Population-averaged standard  
075 template brain atlas for the common marmoset (*Callithrix jacchus*). *Neuroimage* **54**, 2741-  
076 2749 (2011).

077  
078 73. M. Takei, T. Kida, K. Suzuki, Sensitive measurement of positron emitters eluted from  
079 HPLC. *Appl. Radiat. Isot.* **55**, 229-234 (2001).  
080  
081  
082

## 083 **Acknowledgments**

084

085 **General:** The authors thank Kana Osawa, Kaori Yuki, Kanami Ebata, Takahiro Shimizu,  
086 Azusa Ishikawa, Tomomi Kokufuta, Jun Kamei, Ryuji Yamaguchi, Yuichi Matsuda,  
087 Yoshio Sugii, Anzu Maruyama, and Takashi Okauchi at the National Institutes for  
088 Quantum and Radiological Science and Technology for technical assistance. We thank  
089 Shunsuke Koga and Dennis W. Dickson at the Mayo Clinic, and John Robinson, John Q.  
090 Trojanowski, and Virginia M.-Y. Lee at the University of Pennsylvania for case selection  
091 and kindly sharing postmortem brain tissues. **Funding:** This study was supported in part  
092 by MEXT KAKENHI Grant Number JP16K19872 to M.O., and by AMED under Grant  
093 Number JP18dm0207018 and JP20dm0207072 to M.Higuchi, JP20dk027046 to M.O..  
094 **Author contributions:** M.O. and M.Higuchi conceived and designed the project. M.O.,  
095 M.T., M.F., W.M., Y.N., K.M., T.Minamihisamatsu, S.U., K.K., and Y.Takado performed  
096 the experimental work. M.Hasegawa, A.S., M.S., H.T., H.S., and A.K provided the  
097 resource. N.S., M.-R.Z., T.Minamimoto, M.Hasegawa, and M.Higuchi directed the work.  
098 All authors reviewed and edited the manuscript. **Competing interests:** M.O., M.-R.Z.,  
099 and M.Higuchi filed a patent on compounds related to the present report (2019-034997,  
100 PCT/JP2020/002607). **Data and materials availability:** All data needed to evaluate the  
101 conclusions in the paper are present in the paper and/or the Supplementary Materials. The  
102 C05 series compounds can be provided by M.O. pending scientific review and a  
103 completed material transfer agreement. Requests for the above compounds should be  
104 submitted to [ono.maiko@qst.go.jp](mailto:ono.maiko@qst.go.jp).  
105  
106  
107  
108



109 **Figures and Tables**

110

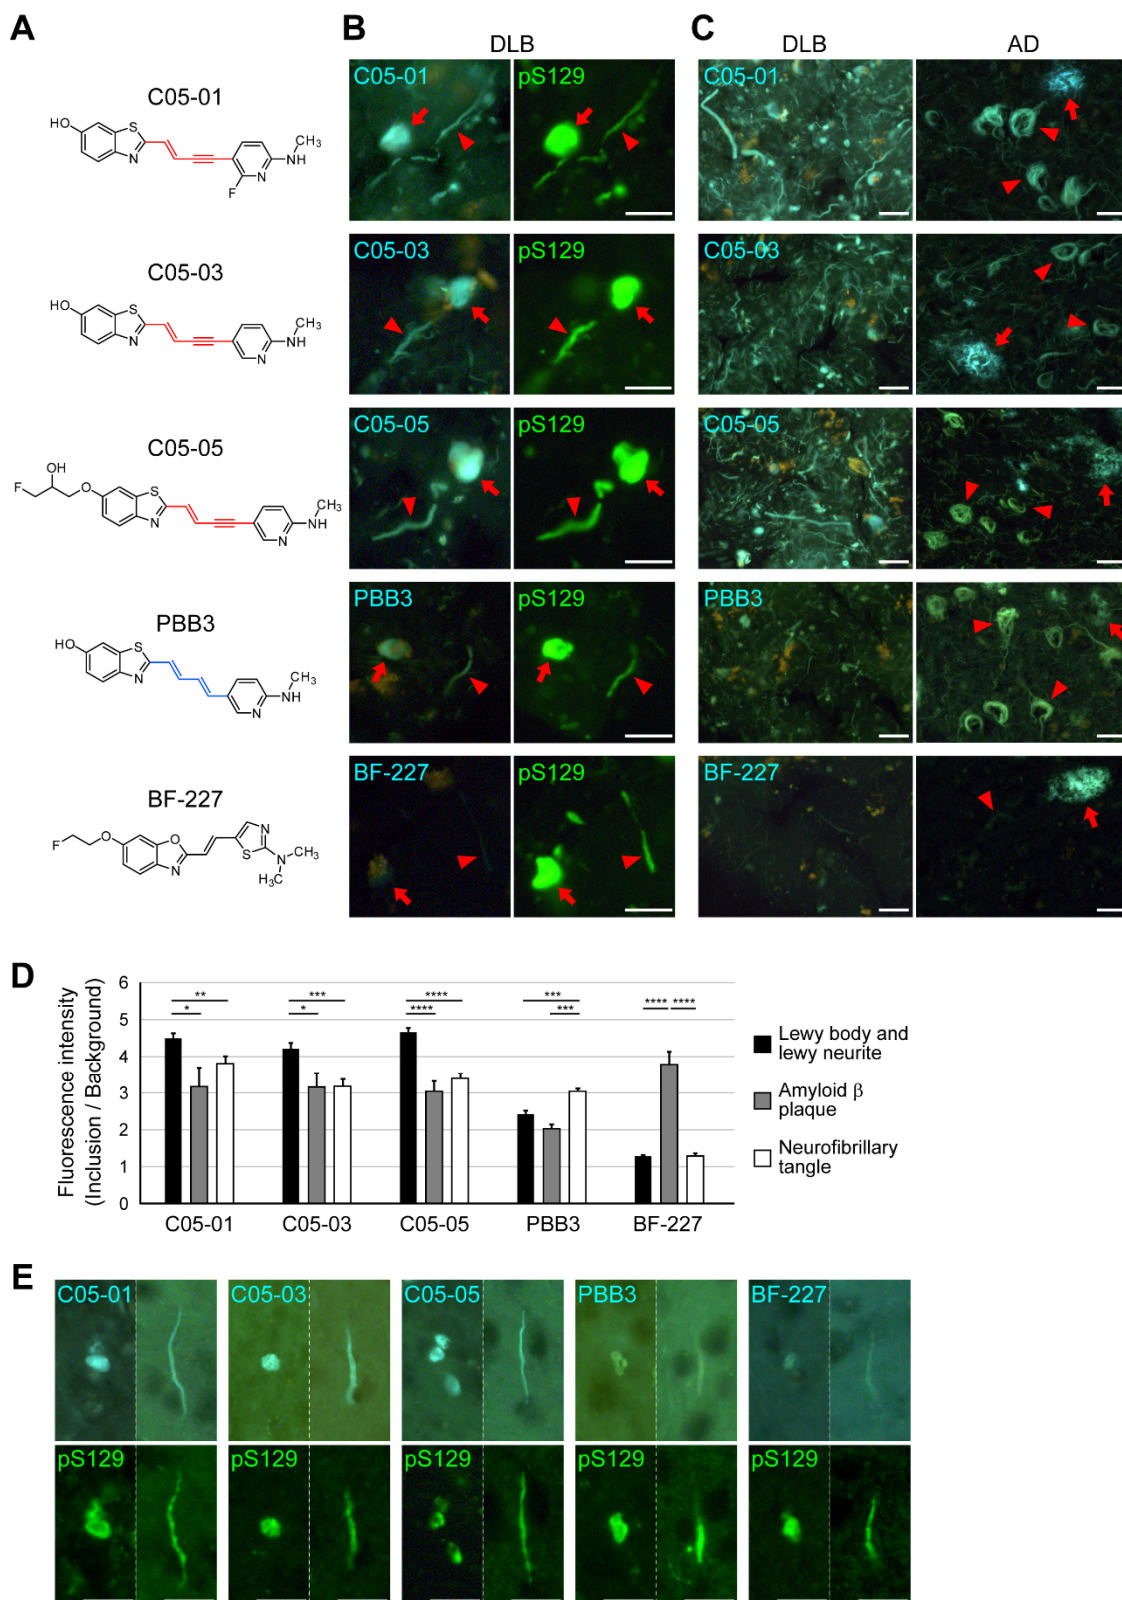

111

112

113

114

115

116

**Fig. 1. C05 series compounds bind to  $\alpha$ -synuclein inclusions in DLB and mouse model of  $\alpha$ -synucleinopathy *in vitro*.** (A) Chemical structures of C05 series compounds, PBB3 and BF-227. C05-01, C05-03, and C05-05 are derivatives from PBB3 with the substitution of its (2E,4E)-hexa-2,4-diene linker (blue) with (E)-

117 hex-2-en-4-yne (red). **(B)** Double fluorescence staining of Lewy bodies (arrows)  
118 and Lewy neurites (arrowheads) in the amygdala sections of a patient with DLB  
119 (also see Table S1) with 30  $\mu$ M of self-fluorescent ligands (left) and anti-  
120 phosphorylated  $\alpha$ -synuclein antibody, pS129 (right). C05-01, C05-03, and C05-05  
121 intensely labeled  $\alpha$ -synuclein inclusions in DLB brain sections, while PBB3 and  
122 BF-227 yielded moderate and weak staining of these lesions, respectively. **(C)**  
123 Fluorescence microscopic images of various fibrillary protein pathologies,  
124 including Lewy bodies and Lewy neurites in the amygdala sections of a patient  
125 with DLB (left) and amyloid plaques (right, arrows) and neurofibrillary tangles  
126 (right, arrowheads) in the middle frontal gyrus sections of a patient with AD (AD-  
127 1, also see Table S1), labeled with C05-01, C05-03, C05-05, PBB3, and BF-227  
128 were taken under a uniform imaging condition. **(D)** Fluorescence signal intensities  
129 in Lewy bodies and neurites (black), amyloid plaques (gray), and neurofibrillary  
130 tangles (white) in the images illustrated in **C** were normalized according to  
131 background signals. Quantification of the background-corrected fluorescence  
132 intensity indicated that C05-01 ( $F_{(2, 74)} = 6.729, p = 0.0021$ ), C05-03 ( $F_{(2, 73)} =$   
133  $9.151, p = 0.0003$ ), and C05-05 ( $F_{(2, 85)} = 36.92, p < 0.0001$ ) bound to  $\alpha$ -synuclein  
134 pathologies produced significantly more intense signals than these chemicals  
135 bound to A $\beta$  and tau pathologies. In contrast, PBB3 bound to tau pathologies  
136 elicited stronger fluorescence than this compound bound to  $\alpha$ -synuclein and A $\beta$   
137 pathologies ( $F_{(2, 73)} = 12.57, p < 0.0001$ ), and the fluorescence signals attributed to  
138 BF-227 bound to A $\beta$  pathologies were significantly more intense than the signals  
139 related to  $\alpha$ -synuclein- and tau-bound BF-227 ( $F_{(2, 63)} = 114.0, p < 0.0001$ ). Data  
140 are presented as mean  $\pm$  SD. \*,  $p < 0.05$ ; \*\*,  $p < 0.01$ ; \*\*\*,  $p < 0.001$ ; \*\*\*\*,  $p <$   
141  $0.0001$  by one-way ANOVA with post-hoc Tukey's HSD test. **(E)** Double  
142 fluorescence staining of  $\alpha$ -synuclein inclusions resembling Lewy bodies (left) and  
143 Lewy neurites (right) in the neocortical sections of an  $\alpha$ -Syn mouse injected with  
144  $\alpha$ -synuclein fibrils into the unilateral striatum (10 weeks after inoculation) with 30  
145  $\mu$ M of self-fluorescent ligands (top) and pS129 (bottom). Scale bars, 20  $\mu$ m (**B**, **C**,  
146 and **E**).  
147  
148

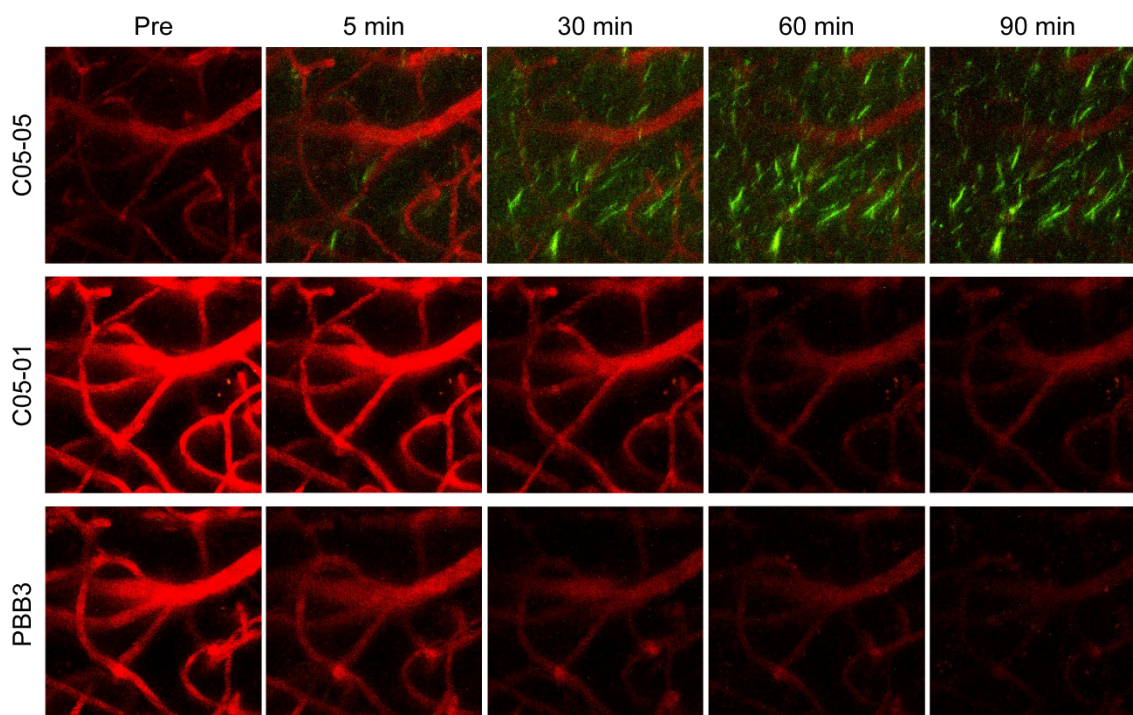

149  
150  
151 **Fig. 2. C05-05 enables *in vivo* optical visualization of individual  $\alpha$ -synuclein**

152 **inclusions in the brain of an  $\alpha$ -Syn mouse model.** Maximum intensity projection  
153 of fluorescence signals in an identical 3D volume (field of view,  $150 \times 150 \mu\text{m}$ ;  
154 depth, 25 - 100  $\mu\text{m}$  from the brain surface) of the somatosensory cortex of a living  
155  $\alpha$ -Syn mouse at 8 - 10 weeks after inoculation of  $\alpha$ -synuclein fibrils into the  
156 neocortex. Exogenous  $\alpha$ -synuclein fibrils were found to vanish by 2 weeks after  
157 injection, followed by aggregation of endogenous  $\alpha$ -synuclein molecules. From  
158 left, images acquired before (Pre) and 5, 30, 60 and 90 min after intraperitoneal  
159 administration of C05-05 (1.66 mg/kg) (top), C05-01 (1.66 mg/kg) (middle), and  
160 PBB3 (1.66 mg/kg) (bottom) are displayed. Cerebral blood vessels were labeled in  
161 red with intraperitoneally administered sulforhodamine 101. Somatodendritic  
162 labeling of putative neurons with C05-05 was observed as green fluorescence from  
163 5 min after ligand administration. Fluorescence images of the corresponding area  
164 at 5 - 90 min after C05-01 and PBB3 injections demonstrated no overt retention of  
165 the tracer in the tissue.  
166



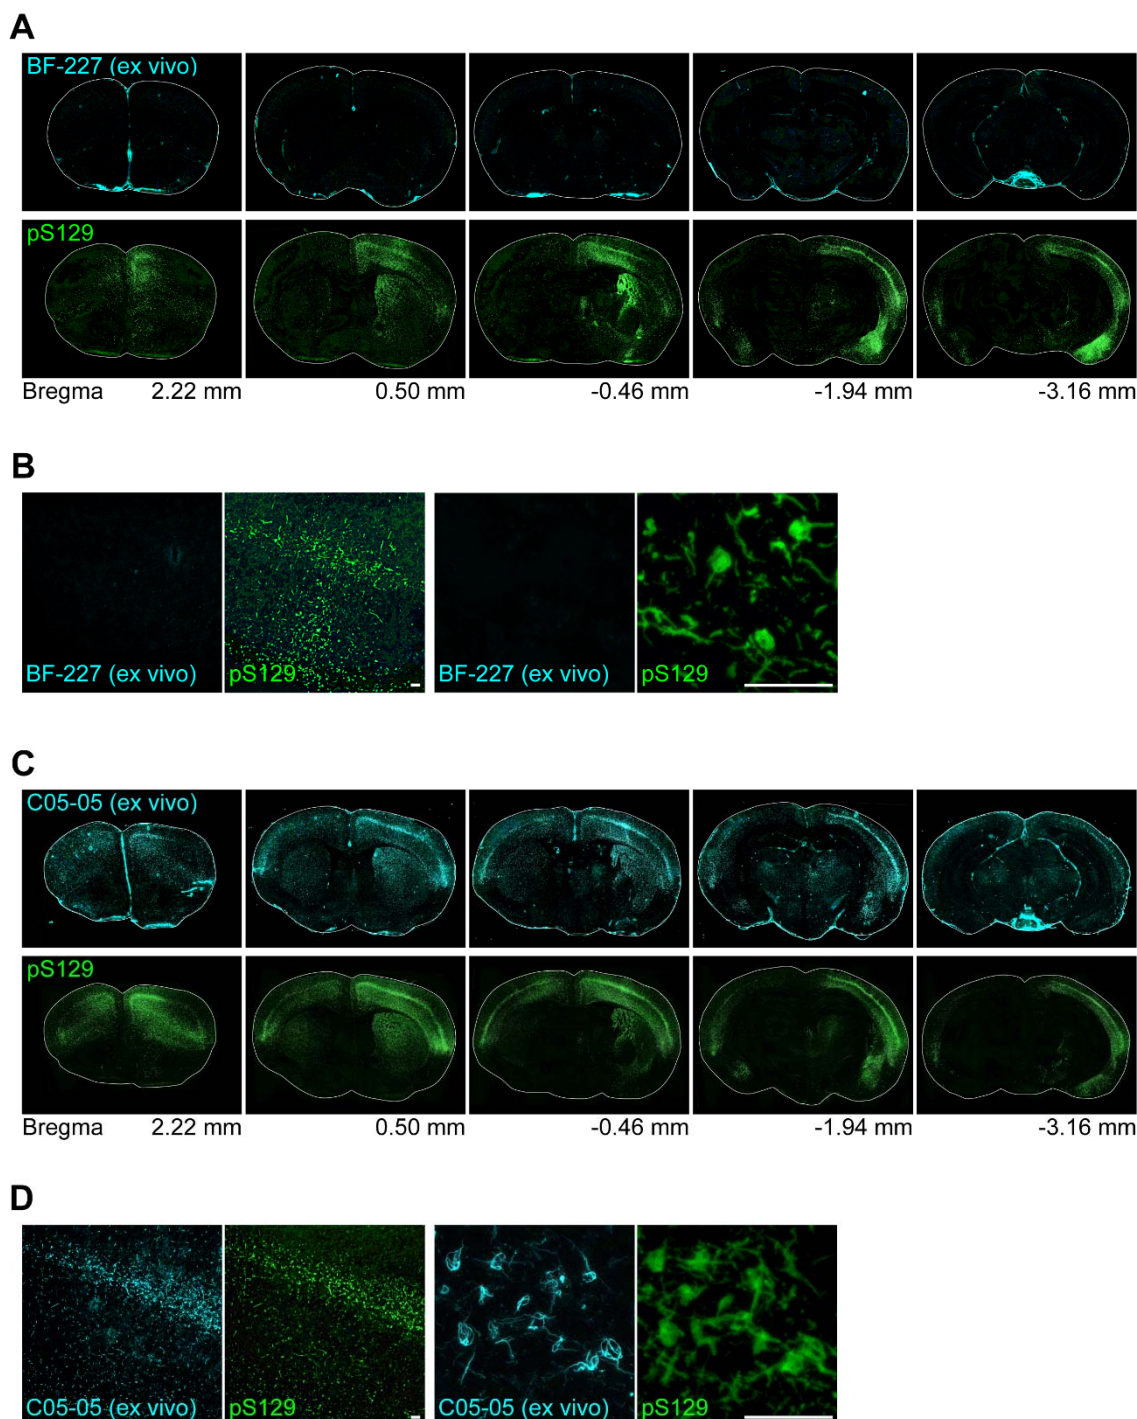

167  
168  
169  
170  
171  
172  
173  
174  
175  
176  
177  
178  
179

**Fig. 3. C05-05 enables *ex vivo* detection of  $\alpha$ -synuclein inclusions in the brain of an  $\alpha$ -synucleinopathy mouse model. (A) *Ex vivo* examination of frozen brain sections from an  $\alpha$ -Syn mouse at 10 weeks after the inoculation of  $\alpha$ -synuclein fibrils into the right striatum. The brain tissue was collected at 2 hours after intraperitoneal administration of BF-227 (1.66 mg/kg). Distributions of systemically injected BF-227 in coronal brain sections (top) and postmortem immunolabeling of adjacent sections with pS129 (bottom) at bregma +2.22, +0.50, -0.46, -1.94, and -3.16 mm are displayed. (B) Medium-power (left) and high-power (right) photomicrographs of cortical sections shown in A. *Ex vivo* examination revealed that  $\alpha$ -synuclein inclusions were devoid of labeling with intraperitoneally administered BF-227. (C) *Ex vivo* examination of frozen brain sections from an  $\alpha$ -Syn mouse at 8 weeks after**



180 the inoculation of  $\alpha$ -synuclein fibrils into the right striatum. The brain tissue was  
181 collected at 90 min after intraperitoneal administration of C05-05 (1.66 mg/kg).  
182 Distributions of systemically injected C05-05 in coronal brain sections (top) and  
183 immunolabeling of adjacent brain sections with pS129 (bottom) at bregma +2.22,  
184 +0.50, -0.46, -1.94 and -3.16 mm are displayed. **(D)** Medium-power (left) and  
185 high-power (right) photomicrographs of cortical sections shown in **C**. Individual  $\alpha$ -  
186 synuclein inclusions were found to be intensely labeled with intraperitoneally  
187 administered C05-05. Scale bars, 50  $\mu$ m (**B** and **D**).  
188  
189

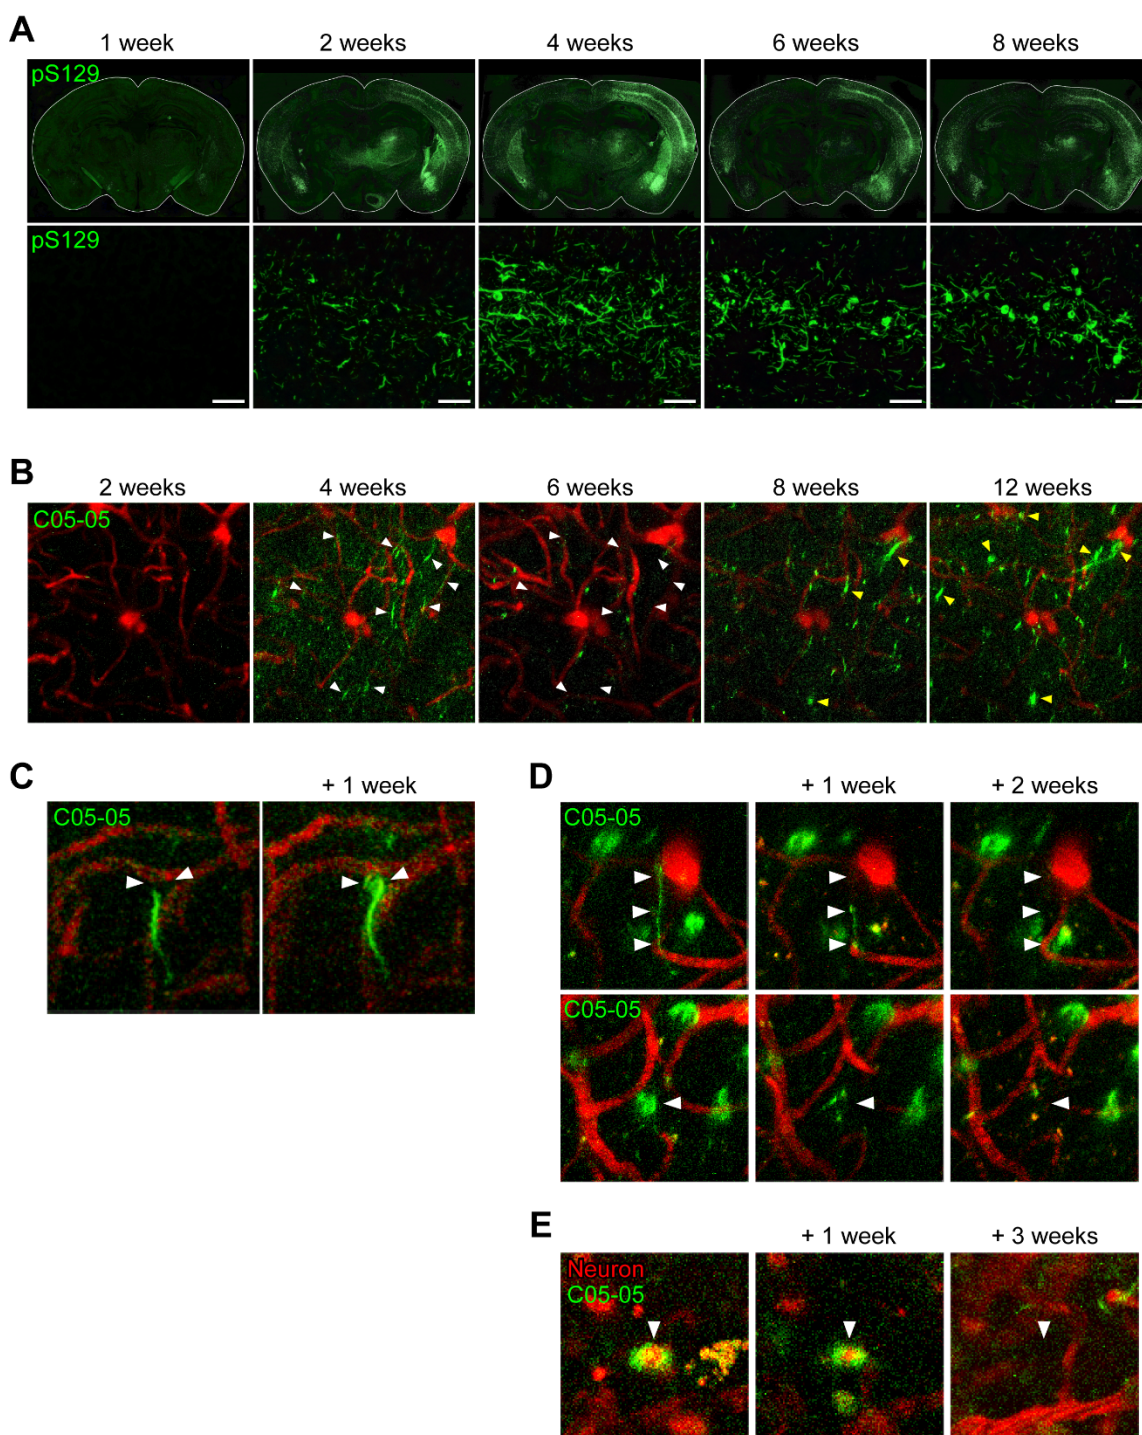

190  
191  
192 **Fig. 4. Pathological  $\alpha$ -synuclein propagates to extensive brain areas with a transient**  
193 **oscillation of the aggregate amount in the brains of a living  $\alpha$ -Syn mouse**  
194 **model. (A) Distribution of phosphorylated  $\alpha$ -synuclein immunostained with pS129**  
195 **in coronal brain sections at bregma -1.94 of  $\alpha$ -Syn mice at 1, 2, 4, 6, and 8 weeks**  
196 **after inoculation of  $\alpha$ -synuclein fibrils into the right striatum (top), and high-power**  
197 **photomicrographs of the ipsilateral somatosensory cortex (bottom). Scale bars, 50**  
198  **$\mu$ m. (B) Longitudinal *in vivo* two-photon microscopic imaging of  $\alpha$ -synuclein**  
199 **inclusions with systemically administered C05-05 in the right somatosensory**  
200 **cortex of a single individual  $\alpha$ -Syn mouse at 2, 4, 6, 8, and 12 weeks after**  
201 **inoculation of  $\alpha$ -synuclein fibrils into the right striatum. A maximum projection of**  
202 **fluorescence in an identical 3D volume (field of view,  $182 \times 182 \mu$ m; depth, 40 -**

203 400  $\mu\text{m}$  from the brain surface) at 90 min after intraperitoneal administration of  
204 C05-05 demonstrated propagation of C05-05-positive  $\alpha$ -synuclein inclusions to the  
205 cortical area from 4 weeks after the intrastriatal fibril inoculation, and subsequent  
206 changes in the subcellular location and amount of the inclusions. White  
207 arrowheads indicate neuritic  $\alpha$ -synuclein accumulations which disappeared from 4  
208 to 6 weeks after the fibril inoculation, and yellow arrowheads indicate somatic  $\alpha$ -  
209 synuclein inclusions which appeared from 8 weeks after the fibril inoculation. (**C**-  
210 **E**) Longitudinal intravital microscopy of the somatosensory cortex (field of view,  
211  $55 \times 55 \mu\text{m}$ ; depth, 0 - 75  $\mu\text{m}$  from the brain surface) of an  $\alpha$ -Syn mouse  
212 demonstrated extension of a C05-05-positive intraneuronal  $\alpha$ -synuclein inclusion  
213 from neurite to soma in a week (**C**, arrowheads), and disappearance of C05-05-  
214 positive (green) neuritic inclusion similar to Lewy neurite (**D**, top, arrowheads) and  
215 somatic deposit resembling Lewy body (**D**, bottom, arrowheads) like inclusions in  
216 two weeks, along with loss of a mCherry-expressing (red) neuron bearing a C05-  
217 05-positive (green) inclusion (**E**, arrowheads) in three weeks. Cerebral blood  
218 vessels were also labeled in red with intraperitoneally administered  
219 sulforhodamine 101 (**B-E**).  
220  
221

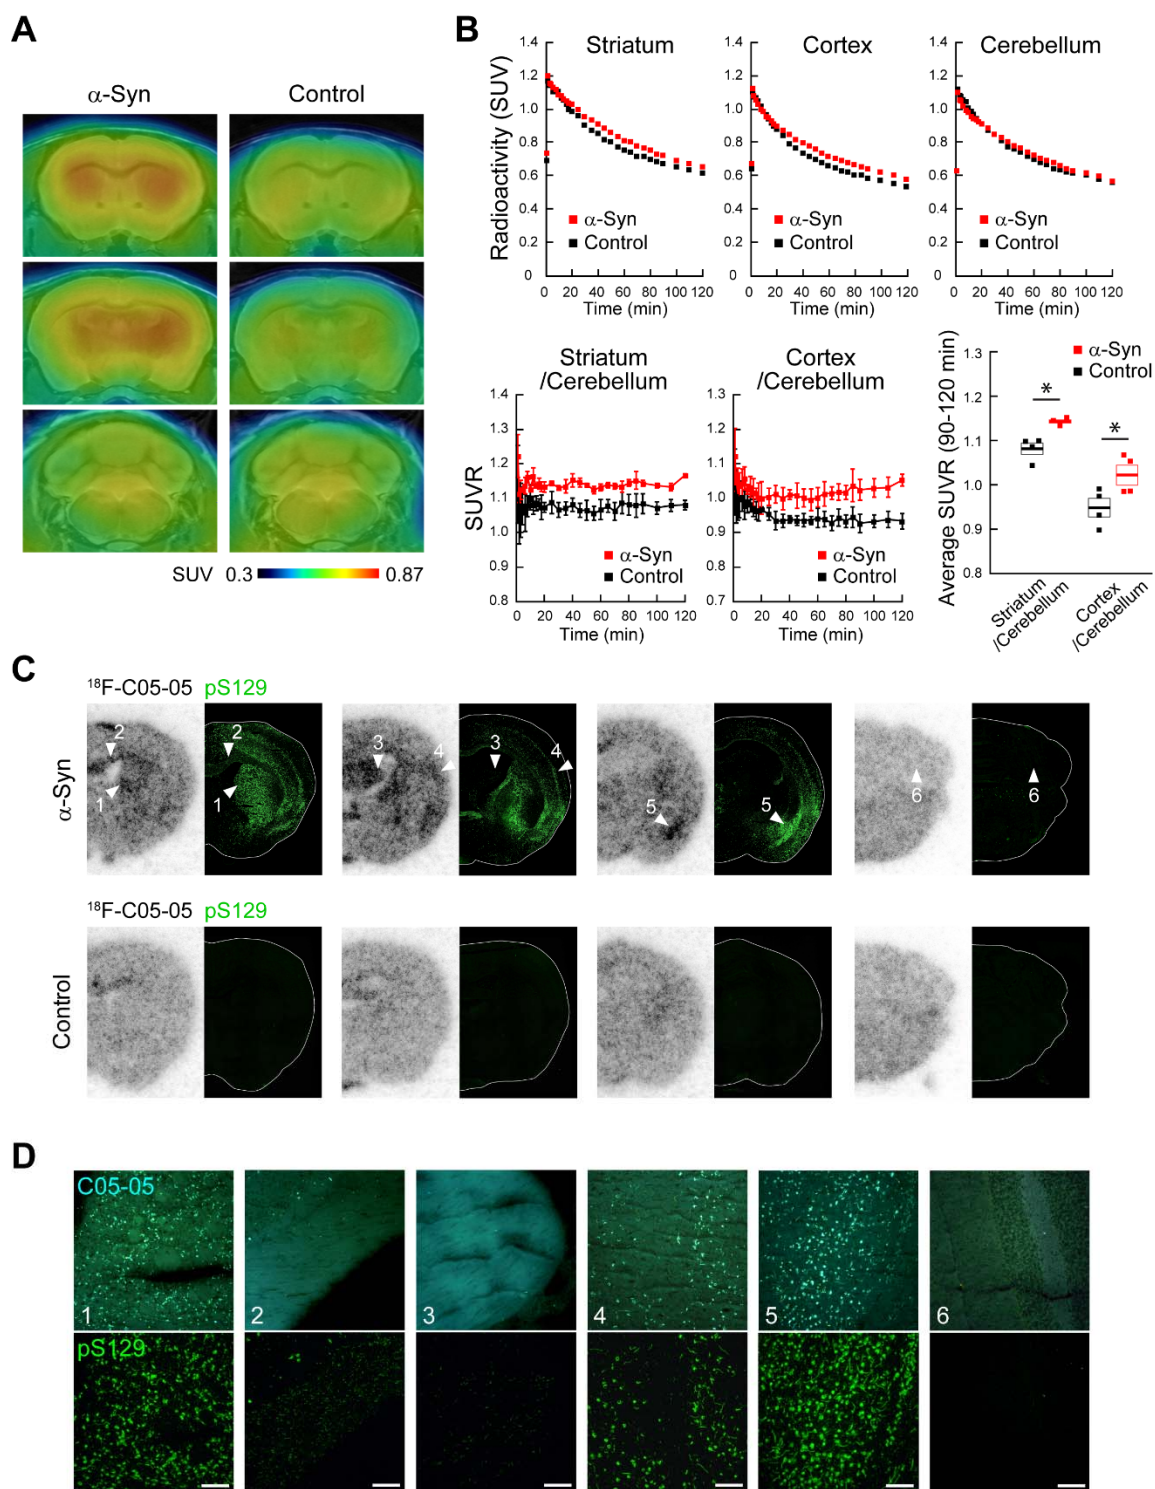

**Fig. 5. *In vivo* PET imaging with  $^{18}\text{F}$ -C05-05 detects  $\alpha$ -synuclein deposits in the brains of  $\alpha$ -Syn mice. (A) Coronal PET images at bregma +0.50 mm (top) and -0.46 mm (middle) containing the striatum and neocortex, and -6.64 mm (bottom) containing the cerebellum generated by averaging dynamic scan data at 60 - 90 min after intravenous administration of  $^{18}\text{F}$ -C05-05 ( $30.8 \pm 0.4$  MBq) in mice at 6 months after inoculation of  $\alpha$ -synuclein fibrils ( $\alpha$ -Syn mouse, left) or saline (control mouse, right) into the bilateral striata. PET images are superimposed on an MRI template. Voxel values represent SUV. (B) Time-radioactivity curves in the striatum, neocortex, and cerebellum during the dynamic PET scan (top), time-**



233 course changes in the target-to-cerebellum ratio of radioactivity (SUVR, left and  
234 middle panels in bottom row), and the average of target-to-cerebellum ratios at 90  
235 - 120 min (bottom, right) in  $\alpha$ -Syn (red symbols) and control (black symbols)  
236 mice. There were significant main effects of animal group and region in two-way,  
237 repeated-measures ANOVA (group,  $F_{(1, 6)} = 11.39$ ,  $p = 0.015$ ; region,  $F_{(1, 6)} = 111.9$ ,  
238  $p < 0.0001$ ). \*,  $p < 0.05$  by Bonferroni's post hoc test. Data are presented as mean  
239 (top) or mean  $\pm$  SEM (bottom) in four  $\alpha$ -Syn or control mice. **(C)** *Ex vivo*  
240 examination of frozen brain sections obtained from  $\alpha$ -Syn (top) and control  
241 (bottom) mice after PET imaging to assess distributions of radiointrasvenously  
242 administered  $^{18}\text{F}$ -C05-05 ( $27.8 \pm 0.2$  MBq), in comparison with immunolabeling of  
243 the same sections with pS129. From left, coronal brain sections at bregma +0.50, -  
244 0.46, -1.94, and -6.64 mm are displayed. **(D)** High-power photomicrographs  
245 showing double fluorescence staining of the section used for *ex vivo* examination  
246 with 30  $\mu\text{M}$  of unlabeled C05-05 (top) and pS129 (bottom). Areas correspond to  
247 those indicated by arrowheads in C. The striatum **(1)**, somatosensory cortex **(4)**,  
248 and amygdala **(5)** of an  $\alpha$ -Syn mouse contained abundant  $\alpha$ -synuclein inclusions.  
249 The corpus callosum **(2)** and fimbria of the hippocampus **(3)** showed a small  
250 number of  $\alpha$ -synuclein deposits. The cerebellum **(6)** contained very few  $\alpha$ -  
251 synuclein inclusions. Scale bars, 100  $\mu\text{m}$ .  
252  
253

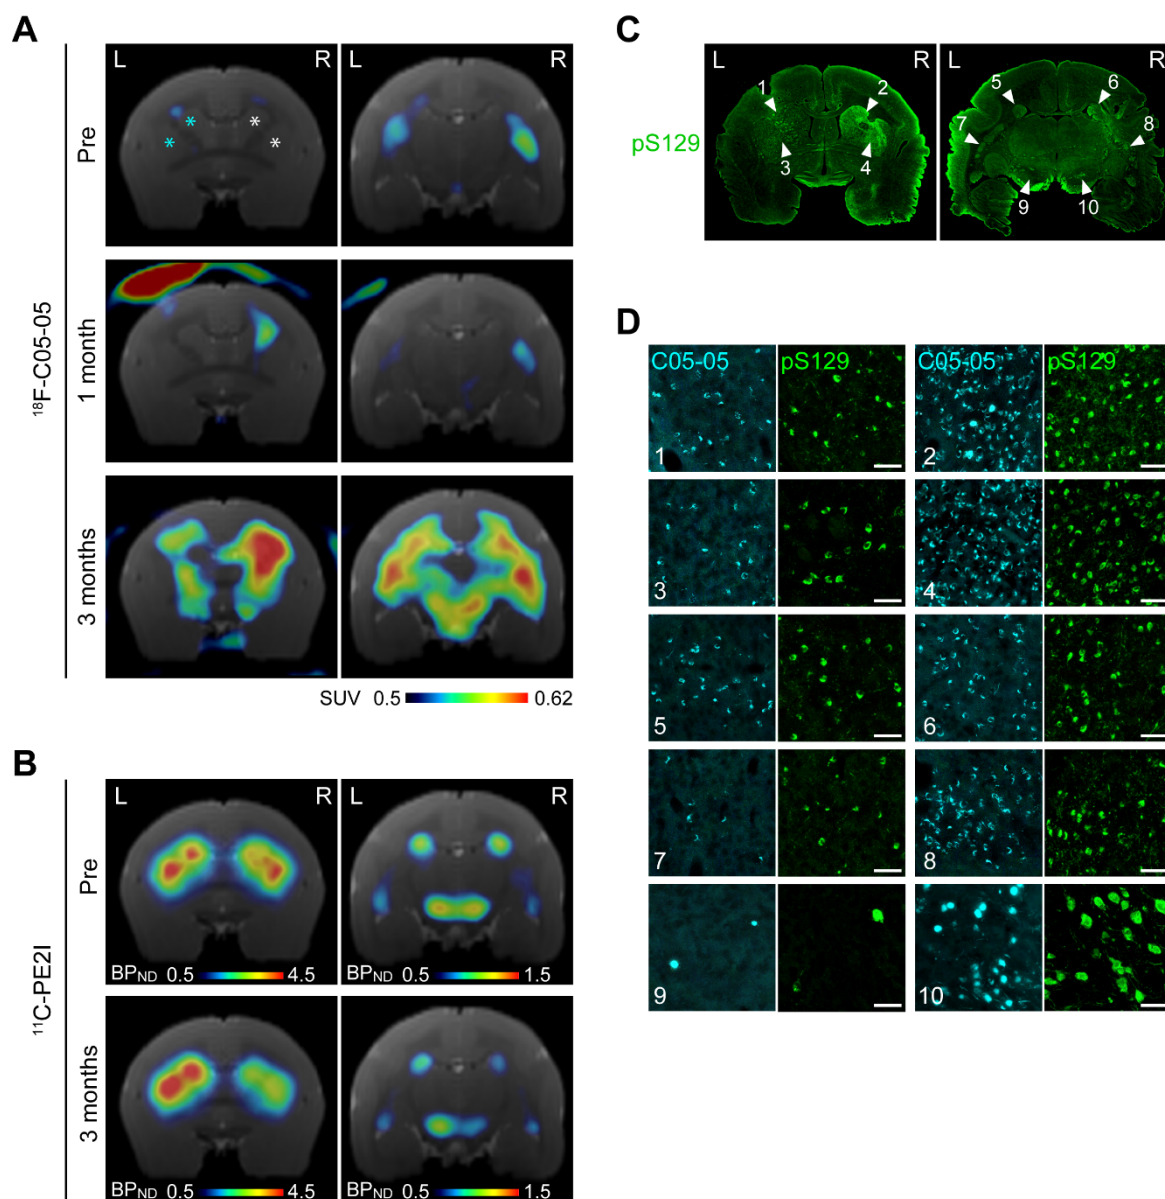

**Fig. 6. Longitudinal *in vivo* PET imaging with  $^{18}\text{F-C05-05}$  visualizes the propagation of pathological  $\alpha$ -synuclein aggregates in the brain of an  $\alpha$ -Syn marmoset. (A)** Coronal brain images in a marmoset injected with  $\alpha$ -synuclein fibrils and saline into the right and left caudate nucleus and putamen, respectively, generated by averaging dynamic PET data at 30 - 120 min after intravenous administration of  $^{18}\text{F-C05-05}$  ( $89.6 \pm 15.3$  MBq) (also see fig. S10). Images were acquired before (Pre), and 1 and 3 months after the fibril inoculation, and white and blue asterisks indicate the sites of  $\alpha$ -synuclein fibril and saline injections, respectively. Brain volume data were sectioned at 9.5 mm (left) and 5.0 mm (right) anterior to the interaural line to generate images containing the caudate nucleus/putamen and caudate nucleus/putamen/substantia nigra, respectively. PET images are superimposed on an MRI template, and voxel values represent SUV. Longitudinal  $^{18}\text{F-C05-05}$ -PET showed the expansion of radioactivity signals from a part of the right caudate nucleus to extensive brain areas, including bilateral regions of the caudate nucleus, putamen, and substantia nigra from 1 to 3 months after inoculation. **(B)** Parametric images of  $\text{BP}_{\text{ND}}$  for  $^{11}\text{C-PE2I}$  (radioactivity dose:  $89.2 \pm 2.0$  MBq) in a single individual  $\alpha$ -Syn marmoset demonstrated reduction of the

273 radioligand binding in the right caudate nucleus, putamen, and substantia nigra at 3  
274 months after inoculation compared to the baseline before inoculation (Pre). Brain  
275 volume data were sectioned at 9.5 mm (left) and 5.0 mm (right) anterior to the  
276 interaural line, and BP<sub>ND</sub> images were superimposed on an MRI template. (C)  
277 Histopathological assays were carried out 1 month after the final PET scan,  
278 demonstrating a similarity between the regional distributions of  $\alpha$ -synuclein  
279 inclusions stained with pS129 and localization of radioligand retentions in <sup>18</sup>F-  
280 C05-05-PET images at 3 months. (D) High-power photomicrographs showing  
281 fluorescence staining of brain sections shown in B with pS129 and adjacent brain  
282 sections with 30  $\mu$ M of non-radiolabeled C05-05. Areas correspond to those  
283 indicated by arrowheads in B. The right caudate nucleus (2 and 6), putamen (4 and  
284 8), and substantia nigra (10) contained highly abundant  $\alpha$ -synuclein inclusions.  
285 The left caudate nucleus (1 and 5) and putamen (3 and 7) contained moderate  
286 amounts of  $\alpha$ -synuclein deposits, and the left substantia nigra (9) contained sparse  
287  $\alpha$ -synuclein inclusions. Scale bars, 50  $\mu$ m.  
288  
289

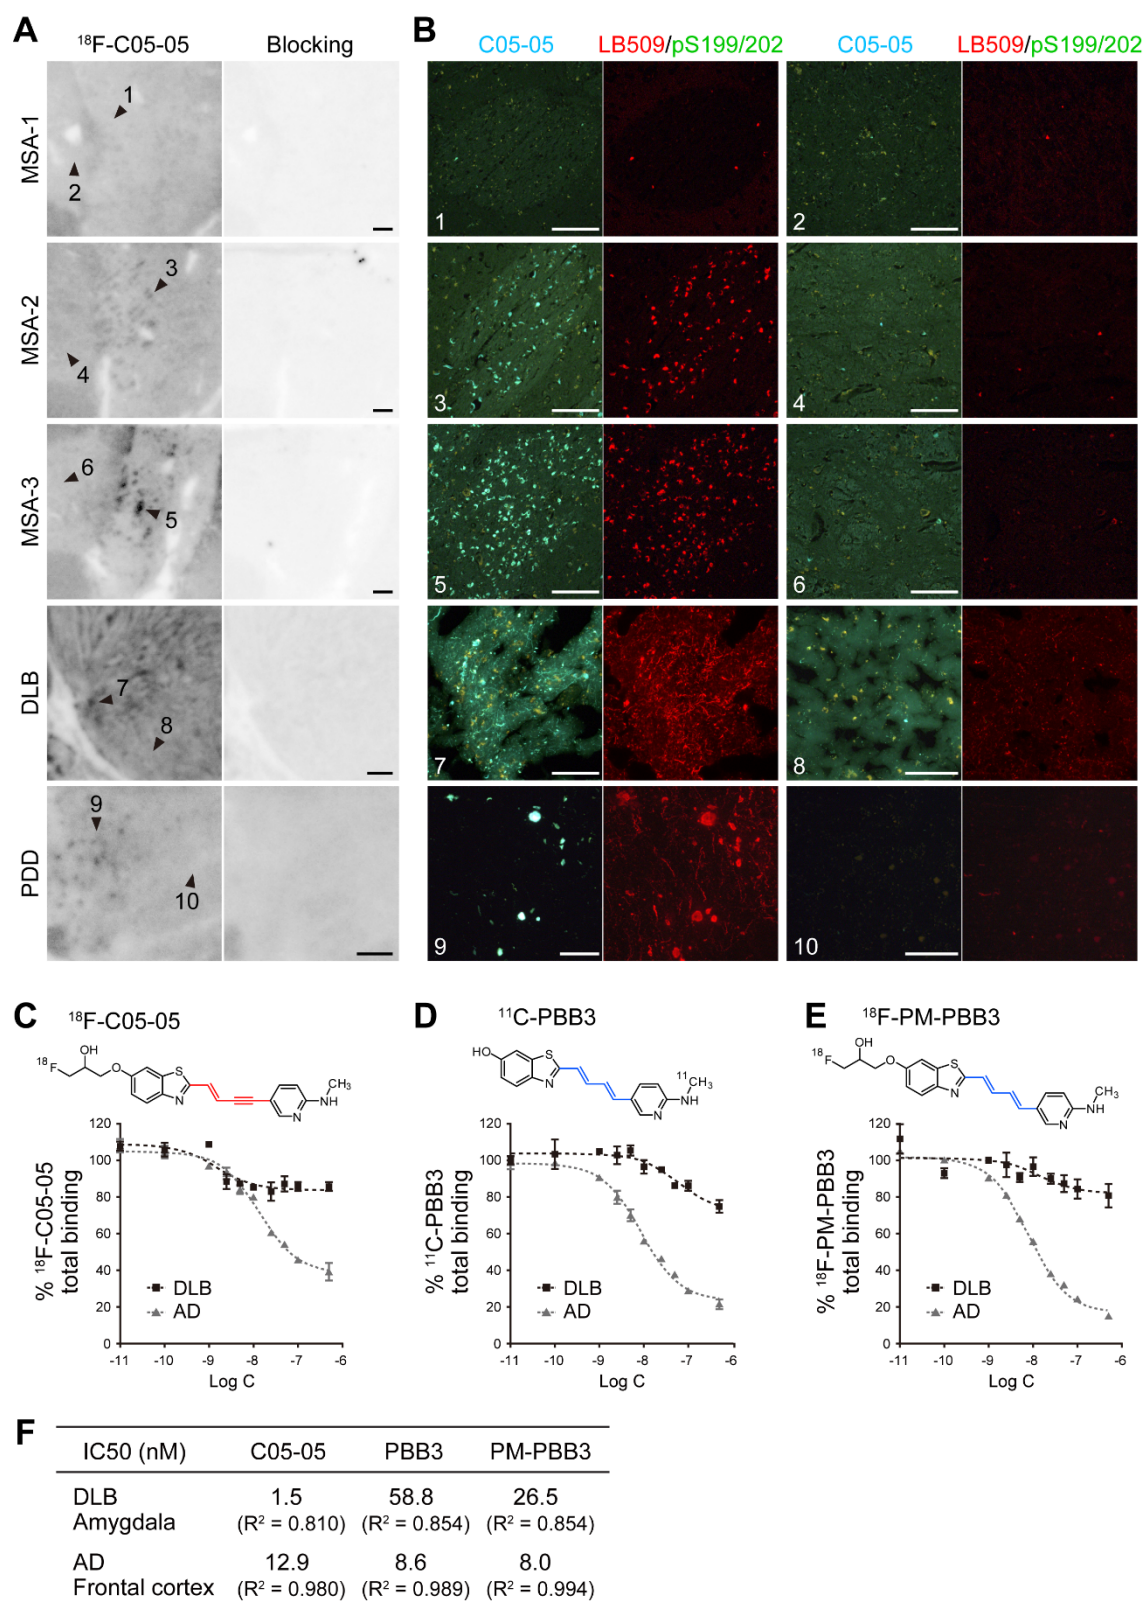

**Fig. 7. <sup>18</sup>F-C05-05 displays high-affinity binding to  $\alpha$ -synuclein pathologies in DLB and MSA brain tissues.** (A and B) Autoradiographic labeling of sections, including the basal ganglia derived from patients with MSA (MSA-1, 2, and 3, also see Table S1), amygdala derived from patients with DLB, and substantia nigra derived from patients with PDD (also see Table S1), with 10 nM of <sup>18</sup>F-C05-05 in the absence (A, left) and presence (A, right) of 10  $\mu$ M of non-radiolabeled C05-05,



298 and high-power photomicrographs showing triple fluorescence staining of the  
299 section used for  $^{18}\text{F}$ -C05-05 autoradiography with 30  $\mu\text{M}$  of non-radiolabeled C05-  
300 05, LB509, and pS199/202 (**B**). Areas in **B** correspond to locations indicated by  
301 arrowheads in **A**. No overt specific binding of  $^{18}\text{F}$ -C05-05 was detected in the  
302 striatopallidal fibers (**1**) of MSA-1 with mild pathology, weak but clearly  
303 noticeable radioligand binding to these fibers (**3**) was seen in MSA-2 with  
304 moderate pathology, and strong radioligand binding to the same subregion (**5**) was  
305 observed in MSA-3 with severe pathology. No significant binding of  $^{18}\text{F}$ -C05-05  
306 was shown in the areas devoid of  $\alpha$ -synuclein pathologies in MSA cases (**2**, **4**, and  
307 **6**). In the amygdala of a DLB case and the substantia nigra of a PDD case, binding  
308 of  $^{18}\text{F}$ -C05-05 was seen in an area harboring abundant Lewy bodies and Lewy  
309 neurites (**7** and **9**). In contrast, no significant binding of  $^{18}\text{F}$ -C05-05 was noted in  
310 an area with a very small amount of  $\alpha$ -synuclein pathologies (**8** and **10**).  
311 Immunohistochemistry with pS199/202 indicated the absence of tau deposits in  
312 these regions. Scale bars, 1 mm (**A**) or 100  $\mu\text{m}$  (**B**). (**C-E**) Total (specific + non-  
313 specific) binding of  $^{18}\text{F}$ -C05-05 (**C**),  $^{11}\text{C}$ -PBB3 (**D**), and  $^{18}\text{F}$ -PM-PBB3 (**E**) in the  
314 DLB amygdala (black squares, also see Table S1) and AD frontal cortex (grey  
315 triangles, AD-2, also see Table S1) samples homologously blocked by non-  
316 radiolabeled C05-05, PBB3, and PM-PBB3, respectively, with varying  
317 concentrations. Data are mean  $\pm$  SD in four samples and are expressed as % of  
318 average total binding. (**F**) Homologous blockades of  $^{18}\text{F}$ -C05-05,  $^{11}\text{C}$ -PBB3, and  
319  $^{18}\text{F}$ -PM-PBB3 binding described by a one-site model and parameters resulting  
320 from curve fits.  
321
